# Supplementary material
Source: PubMed Central journal article supplement (PMC2922519)
Supplement: 1002213107_pnas.201002213SI.pdf [file 1002213107_pnas.201002213SI.pdf]

# Supporting Information

Grudzenski et al. 10.1073/pnas.1002213107

## SI Materials and Methods

**Measurement of Nuclear PAR Synthesis via Nicotinamide-Adenine Dinucleotide-<sup>32</sup>P.** [Adenylate-<sup>32</sup>P] nicotinamide-adenine dinucleotide (NAD) (800 Ci/mM, 5 mCi/mL) was obtained from Perkin-Elmer. To measure PAR synthesis, HSF1 cells were treated with H<sub>2</sub>O<sub>2</sub> or irradiated in a manner identical to that used in the experiments in Fig. 2. In detail, 10<sup>6</sup> cells were first incubated in PB buffer [100 mM K<sub>2</sub>CO<sub>3</sub>, 30 mM KCl, 10 nM Na<sub>2</sub>HPO<sub>4</sub>, 1 mM MgCl<sub>2</sub>, 1 mM Na<sub>2</sub>ATP, 1 μM DTT (pH 7.2)] containing 20 nM NAD-<sup>32</sup>P and H<sub>2</sub>O<sub>2</sub> at 4 °C for 30 min. Cells were then washed three times with cold PB buffer to remove residual H<sub>2</sub>O<sub>2</sub>. Irradiated samples were treated the same way with PB buffer not containing H<sub>2</sub>O<sub>2</sub> and were irradiated at this step. All samples were then incubated in PB buffer with 20 nM fresh NAD-<sup>32</sup>P for 15 min at 37 °C, washed twice in cold PB buffer, and fixed in cold PBS containing 1.5% (wt/vol) paraformaldehyde and 2% (wt/vol) sucrose for 5 min. After washing with PB buffer, cells were transferred in tubes and centrifugated at 400 × g. After washing with PBS, cells were resuspended in Nonidet P-40 buffer [10 mM Tris-HCl, 10 mM NaCl, 3 mM MgCl<sub>2</sub>, 30 mM sucrose, 0.5% Nonidet P-40 (pH 7.0)], centrifugated at 1,500 × g, and resuspended again and centrifugated. Finally, cells were resuspended in CaCl<sub>2</sub> buffer [10 mM Tris-HCl, 10 mM NaCl, 3 mM MgCl<sub>2</sub>, 30 mM sucrose, 10 mM CaCl<sub>2</sub> (pH 7.0)] and centrifugated at 1,500 × g. The resulting cell pellet was dissolved in 2 mL of scintillation liquid, and counts were measured in a scintillation counter.

**Microarray Analysis.** Highly confluent HSF1 cells were H<sub>2</sub>O<sub>2</sub>-treated or irradiated in a manner identical to that used in the experiments in Fig. 2. In short, H<sub>2</sub>O<sub>2</sub> treatment was for 30 min at 4 °C in PBS, followed by incubation in cell culture medium at 37 °C for 5 h and cell harvest. Irradiated samples were also treated with PBS at 4 °C for 30 min (but without H<sub>2</sub>O<sub>2</sub>) and were then irradiated, incubated for 5 h, and lysed in RLT buffer (Qiagen). All the following steps were performed by Aros Applied Biotechnologies according to the methods detailed below.

Three hundred nanograms of total RNA was used as starting material for the cDNA preparation. The first- and second-strand cDNA synthesis was performed using the 3' IVT express Kit (Affymetrix) according to the manufacturer's instructions. Labeled cRNA was prepared using the 3' IVT express Kit according to the manufacturer's instructions.

Six micrograms of cRNA was fragmented at 94 °C for 35 min in fragmentation buffer containing 40 mM Tris-acetate (pH 8.1), 100 mM KOAc, and 30 mM MgOAc. Before hybridization, the fragmented cRNA in a 6× saline-sodium phosphate-EDTA-triton (SSPE-T) hybridization buffer [1 M NaCl, 10 mM Tris (pH 7.6), 0.005% Triton] was heated to 95 °C for 5 min and subsequently to 45 °C for 5 min before loading onto the Affymetrix GeneTitan fully automated hybridization, wash, and scan equipment. The fragmented cRNA was hybridized to the Affymetrix HT U133<sup>+</sup> PM array plate. The readings from the quantitative scanning were normalized with the Robust Multichip Averaging-method (RMA) using Affymetrix Gene Expression Analysis Software before loading into the MeV 4.1.1 for significance analysis of microarrays (SAM) using a false discovery rate threshold of  $\geq 1$  (1).

1. Tusher VG, Tibshirani R, Chu G (2001) Significance analysis of microarrays applied to the ionizing radiation response. *Proc Natl Acad Sci USA* 98:5116–5121.

**Fig. S1.** BrdU incorporation measured by flow cytometry analysis of highly confluent (*Upper*) or exponentially growing (*Lower*) primary human fibroblast line, HSF1. Cells were labeled with BrdU for 5 h before staining with anti-BrdU antibodies and propidium iodide. Cycling cells were observed in the confluent culture at a rate of 0.15% compared with 57.9% in growing cells.

[Fig. S1. \(PDF\)](#)

**Fig. S2.** Enlarged versions of the representative images of  $\gamma$ -H2AX staining shown in Fig. 1A. Each white circle indicates a  $\gamma$ -H2AX focus (green). Several foci are induced at 15 min after 200 mGy in each cell, but the foci are only marked in one cell (inside the rectangle). Note that the images were generated by maximum intensity projection of many image stacks ( $z = 40$ ), which significantly reduces foci intensity compared with the situation of online foci scoring under the microscope. This effect is particularly relevant at early times when the foci are still small. Similarly, it is difficult to discriminate between foci inside nuclei and background signals above or below, which appear to localize to the nucleus in the 2D representations.

[Fig. S2. \(PDF\)](#)

**Fig. S3.** Spontaneous and IR-induced pATM focus levels in the primary human fibroblast line, HSF1. (A) Representative images of pATM staining. Each white circle marks a pATM focus (red). Several foci are induced at 15 min after 200 mGy in each cell, but the foci are only marked in one cell (inside the rectangle). (B) Background numbers of foci were assessed in 14 different samples from seven independent experiments. (C) Focus numbers at 5 min after irradiation with 2.5–200 mGy. The line represents a linear fit to the data points (~20 foci per 1 Gy). (D) Kinetics for the loss of foci in HSF1 cells after different radiation doses. Mean values from three different experiments are displayed. The black part of the columns represents the background values of the samples analyzed in parallel with the respective irradiated samples. Error bars represent the SEM.

[Fig. S3. \(PDF\)](#)

**Fig. S4.**  $\gamma$ -H2AX focus levels at 24 h after 10 mGy. Cells were either untreated, mock-treated, or treated with different concentrations of H<sub>2</sub>O<sub>2</sub> (0.01–10  $\mu$ M) before irradiation. Higher but not lower concentrations of H<sub>2</sub>O<sub>2</sub> are able to “activate” repair of  $\gamma$ -H2AX foci. Background foci numbers (~0.1 focus per cell) were subtracted. Error bars represent the SEM.

[Fig. S4. \(PDF\)](#)

**Fig. S5.** Immunofluorescence staining of 53BP1 (green) in heart, small intestine, and kidney sections of C57BL/6 mice at 10 min and 72 h after in vivo irradiation with 10 mGy. Unirradiated mice served as controls. Each white circle marks a 53BP1 focus. The images are similar to the images in Fig. 3A but represent considerably larger tissue sections. In irradiated tissue samples, several discrete nuclear foci can be observed at 10 min after irradiation. The IR-induced focus levels decline by about 50% within 24 h but are still substantially higher than the focus levels of unirradiated tissue samples.

[Fig. S5. \(PDF\)](#)

**Fig. S6.** 53BP1 staining (green) in the heart, small intestine, and kidney of unirradiated or irradiated C57BL/6 mice analyzed at 10 min or 5 h after in vivo irradiation with 1 Gy. Unirradiated tissues are predominantly negative for 53BP1 foci, whereas several discrete nuclear foci can be observed at 10 min and, to a lesser extent, 5 h after irradiation.

[Fig.S6. \(PDF\)](#)

**Fig. S7.** Spontaneous and IR-induced  $\gamma$ -H2AX foci in various mouse tissues. (A) Focus levels were assessed in the heart, small intestine, and kidney of eight unirradiated mice and three mice analyzed at 10 min after 10 mGy. (B) Focus levels were assessed in the heart, small intestine, and kidney of three mice analyzed at 10 min after 100 mGy and two to three mice analyzed at 10 min after 1 Gy.

[Fig. S7. \(PDF\)](#)

**Fig. S8.** Kinetics for IR-induced  $\gamma$ -H2AX foci in various mouse tissues. Focus levels in the heart, small intestine, and kidney of C57BL/6 mice analyzed at 10 min, 5 h, or 24 h after in vivo irradiation with 10 mGy, 100 mGy, or 1 Gy are shown. Mean values from three mice are displayed. Background foci numbers were subtracted. Error bars represent the SEM.

[Fig. S8. \(PDF\)](#)

**Table S1. List of the genes that are significantly up-regulated in confluent primary human fibroblasts treated with 200 mGy IR, 10  $\mu$ M H<sub>2</sub>O<sub>2</sub>, or 10 mGy IR (relative to untreated control cells)**

| Public ID | Gene Title                                                           | Gene Symbol | Fold change 200 mGy vs. control |
|-----------|----------------------------------------------------------------------|-------------|---------------------------------|
| AI251399  | protein kinase D2                                                    | PRKD2       | -1.7283                         |
| NM_002594 | proprotein convertase subtilisin/kexin type 2                        | PCSK2       | 1.3162                          |
| AI927479  | hypothetical protein LOC552889                                       | LOC552889   | 1.3705                          |
| NM_005823 | Mesothelin                                                           | MSLN        | 1.3851                          |
| BU619319  | KIAA1731                                                             | KIAA1731    | 1.3891                          |
| BC019100  | YTH domain containing 2                                              | YTHDC2      | 1.4042                          |
| AI739378  | euchromatic histone-lysine N-methyltransferase 1                     | EHMT1       | 1.4092                          |
| AI290971  | myotubularin related protein 6                                       | MTMR6       | 1.4463                          |
| AW235355  | translocated promoter region (to activated MET oncogene)             | TPR         | 1.4503                          |
| AI768512  | WNK lysine deficient protein kinase 1                                | WNK1        | 1.4536                          |
| W52819    | SEC22 vesicle trafficking protein homolog C ( <i>S. cerevisiae</i> ) | SEC22C      | 1.4561                          |
| BF673049  | CAP-GLY domain containing linker protein 1                           | CLIP1       | 1.4563                          |
| NM_017571 | coiled-coil domain containing 88A                                    | CCDC88A     | 1.4569                          |
| T68150    | pleckstrin homology-like domain, family B, member 2                  | PHLDB2      | 1.4655                          |
| AW771935  | TEA domain family member 1 (SV40 transcriptional enhancer factor)    | TEAD1       | 1.4744                          |
| NM_025090 | ubiquitin specific peptidase 36                                      | USP36       | 1.4863                          |
| NM_018353 | chromosome 14 open reading frame 106                                 | C14orf106   | 1.4877                          |
| AI808395  | NADH dehydrogenase (ubiquinone) Fe-S protein 1                       | NDUFS1      | 1.4980                          |
| AL045717  | ERO1-like beta ( <i>S. cerevisiae</i> )                              | ERO1LB      | 1.5076                          |
| AI803727  | ---                                                                  | ---         | 1.5257                          |
| Z25431    | NIMA (never in mitosis gene a)-related kinase 1                      | NEK1        | 1.5308                          |
| AI049791  | bioorientation of chromosomes in cell division 1-like                | BOD1L       | 1.5456                          |
| NM_007211 | Ras association (RalGDS/AF-6) domain family (N-terminal) member 8    | RASSF8      | 1.6221                          |
| AI916242  | early endosome antigen 1                                             | EEA1        | 1.6340                          |
| AW968823  | dedicator of cytokinesis 11                                          | DOCK11      | 1.6666                          |

  

| Public ID | Gene Title                                                                 | Gene Symbol | Fold change 10 $\mu$ M H <sub>2</sub> O <sub>2</sub> vs. control |
|-----------|----------------------------------------------------------------------------|-------------|------------------------------------------------------------------|
| U75667    | arginase, type II                                                          | ARG2        | 2.1922                                                           |
| AI561354  | myosin X                                                                   | MYO10       | 1.9791                                                           |
| AI803727  | ---                                                                        | ---         | 1.9509                                                           |
| AI049791  | bioorientation of chromosomes in cell division 1-like                      | BOD1L       | 1.9034                                                           |
| Z25431    | NIMA (never in mitosis gene a)-related kinase 1                            | NEK1        | 1.7835                                                           |
| AF250311  | tribbles homolog 3 ( <i>Drosophila</i> )                                   | TRIB3       | 1.7457                                                           |
| AF199015  | ezrin                                                                      | EZR         | 1.7327                                                           |
| AW131754  | SWI/SNF related, matrix associated, actin dependent regulator of chromatin | SMARCA2     | 1.7161                                                           |
| AU149225  | MAX gene associated                                                        | MGA         | 1.7067                                                           |
| AI927479  | hypothetical protein LOC552889                                             | LOC552889   | 1.6857                                                           |
| NM_007211 | Ras association (RalGDS/AF-6) domain family (N-terminal) member 8          | RASSF8      | 1.6589                                                           |
| AI768512  | WNK lysine deficient protein kinase 1                                      | WNK1        | 1.5935                                                           |
| AF283773  | DDB1 and CUL4 associated factor 11                                         | DCAF11      | 1.5251                                                           |
| AA864758  | ---                                                                        | ---         | 1.5018                                                           |
| BF056459  | coiled-coil domain containing 18                                           | CCDC18      | 1.4678                                                           |
| AI739378  | euchromatic histone-lysine N-methyltransferase 1                           | EHMT1       | 1.4621                                                           |
| BF663141  | ezrin                                                                      | EZR         | 1.4496                                                           |
| AA211909  | TOX high mobility group box family member 2                                | TOX2        | 1.4192                                                           |

  

| Public ID | Gene Title                                                               | Gene Symbol | Fold change 10 mGy vs. control |
|-----------|--------------------------------------------------------------------------|-------------|--------------------------------|
| AI803727  | ---                                                                      | ---         | 1.5397                         |
| AA336502  | structural maintenance of chromosomes flexible hinge domain containing 1 | SMCHD1      | 1.7977                         |
| AI640348  | Proteasome (prosome, macropain) 26S subunit, non-ATPase, 7               | PSMD7       | 1.4038                         |
| BF313832  | DEAH (Asp-Glu-Ala-His) box polypeptide 9                                 | DHX9        | 1.5936                         |
| AA825721  | ---                                                                      | ---         | 1.5012                         |
| AI290971  | myotubularin related protein 6                                           | MTMR6       | 1.4635                         |
| AF011499  | guanine nucleotide binding protein (G protein), alpha 11 (Gq class)      | GNA11       | 1.4124                         |
