# Supplementary material
Source: PubMed Central journal article supplement (PMC2922519)

small intestine control

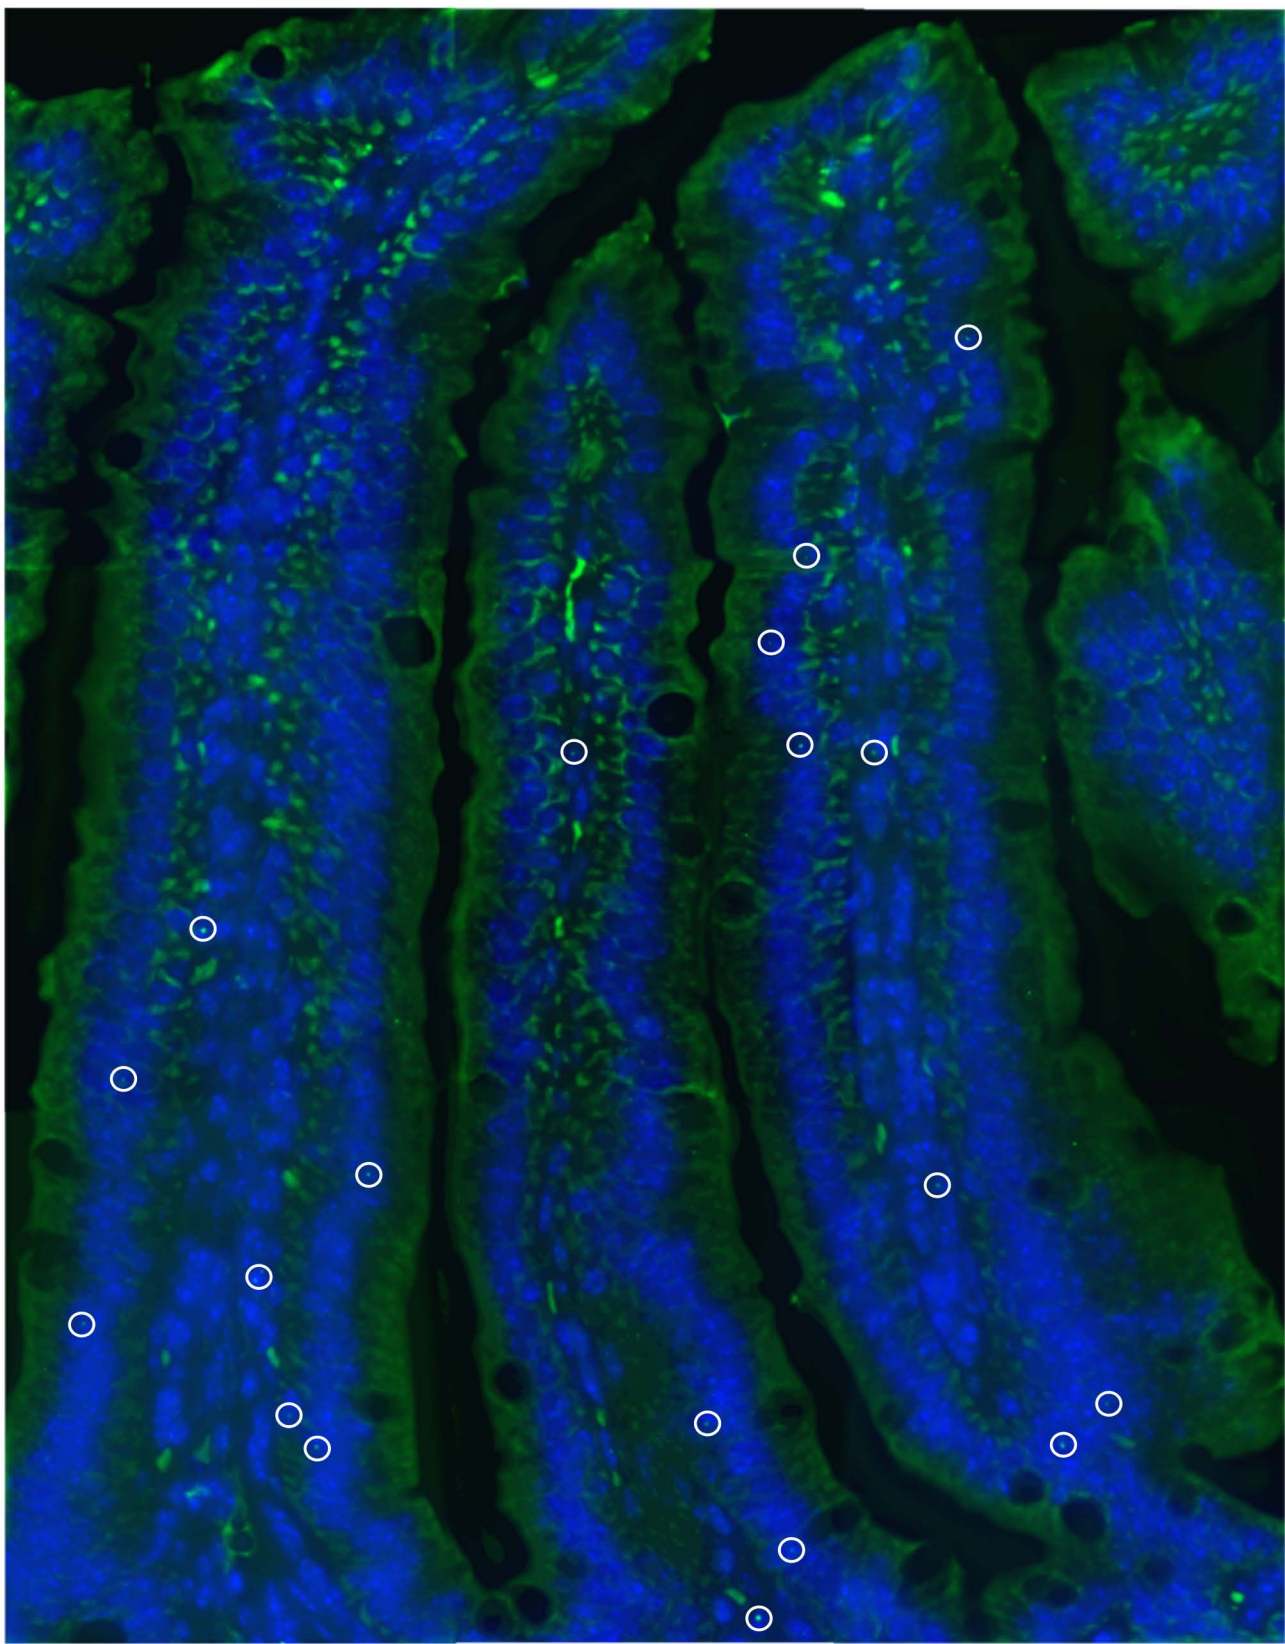

small intestine 10 mGy 10 min

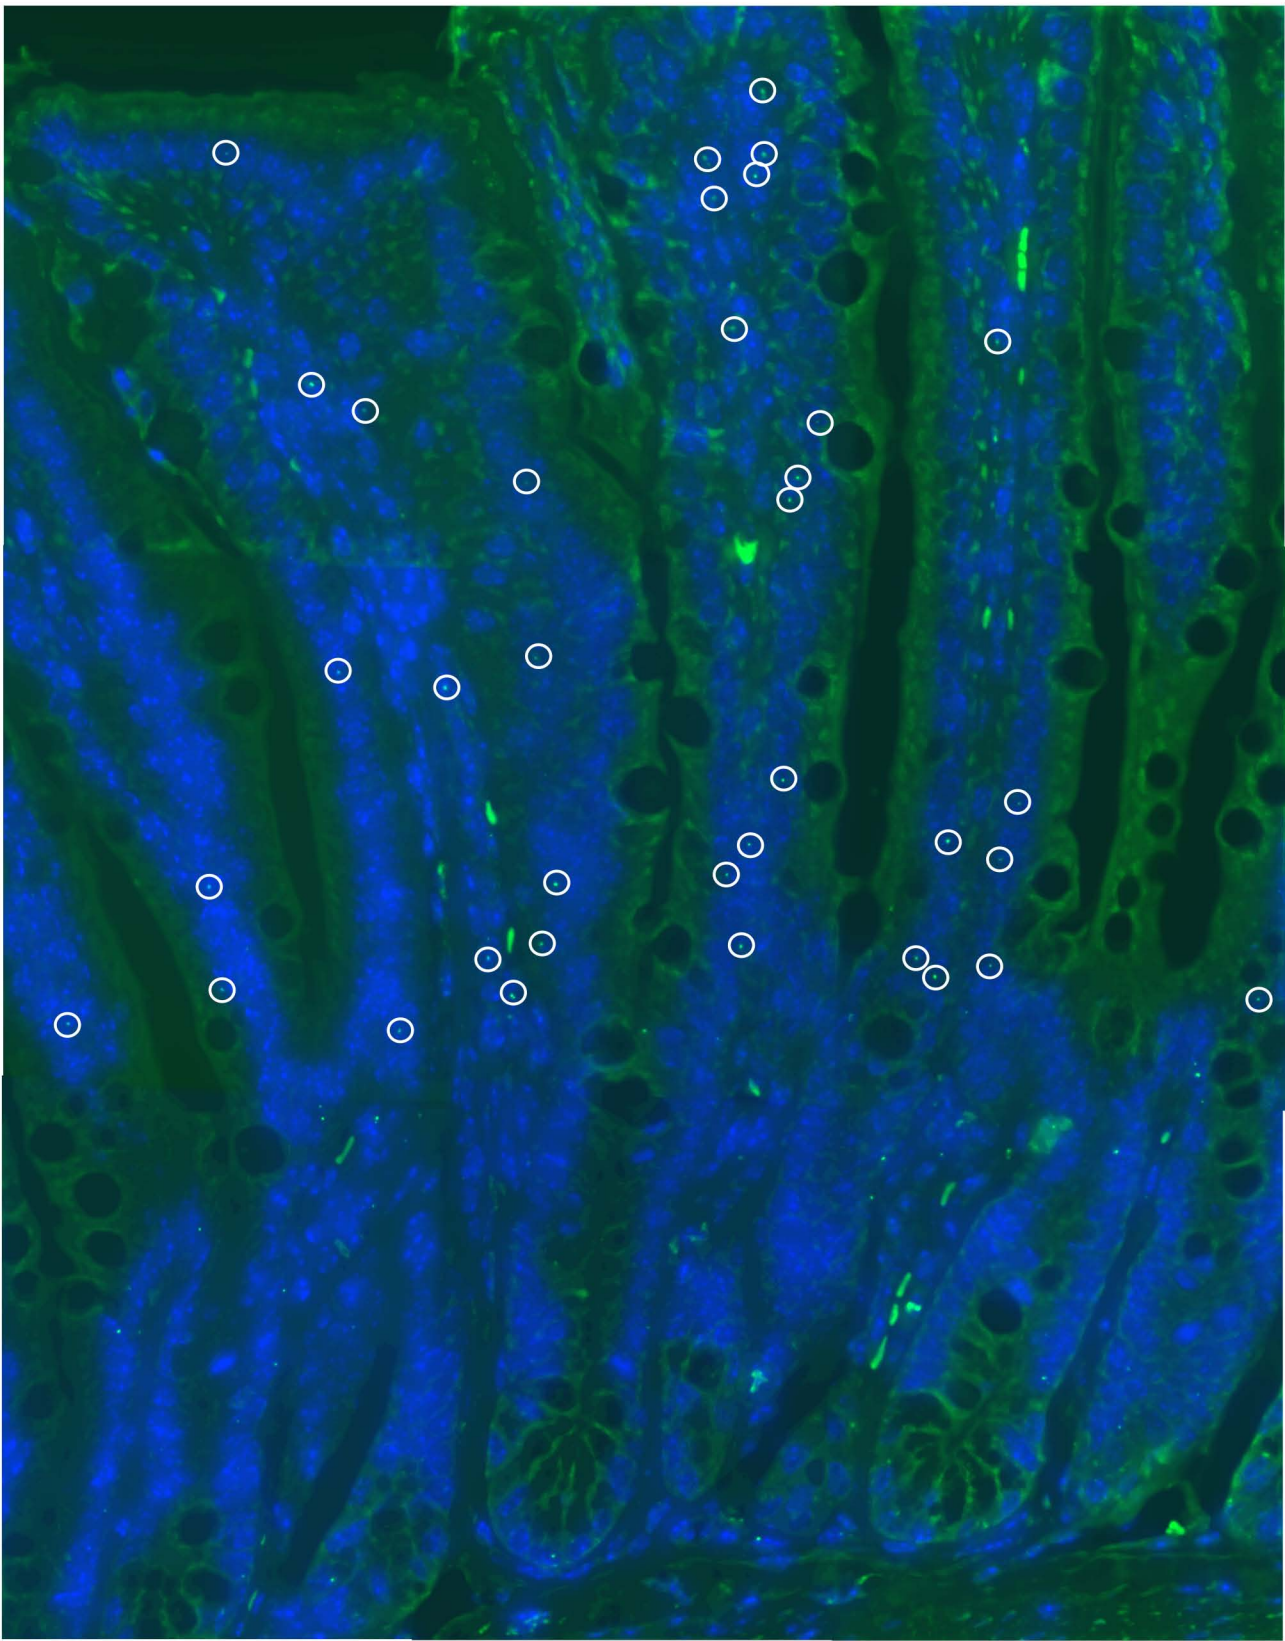

small intestine 10 mGy 72 h

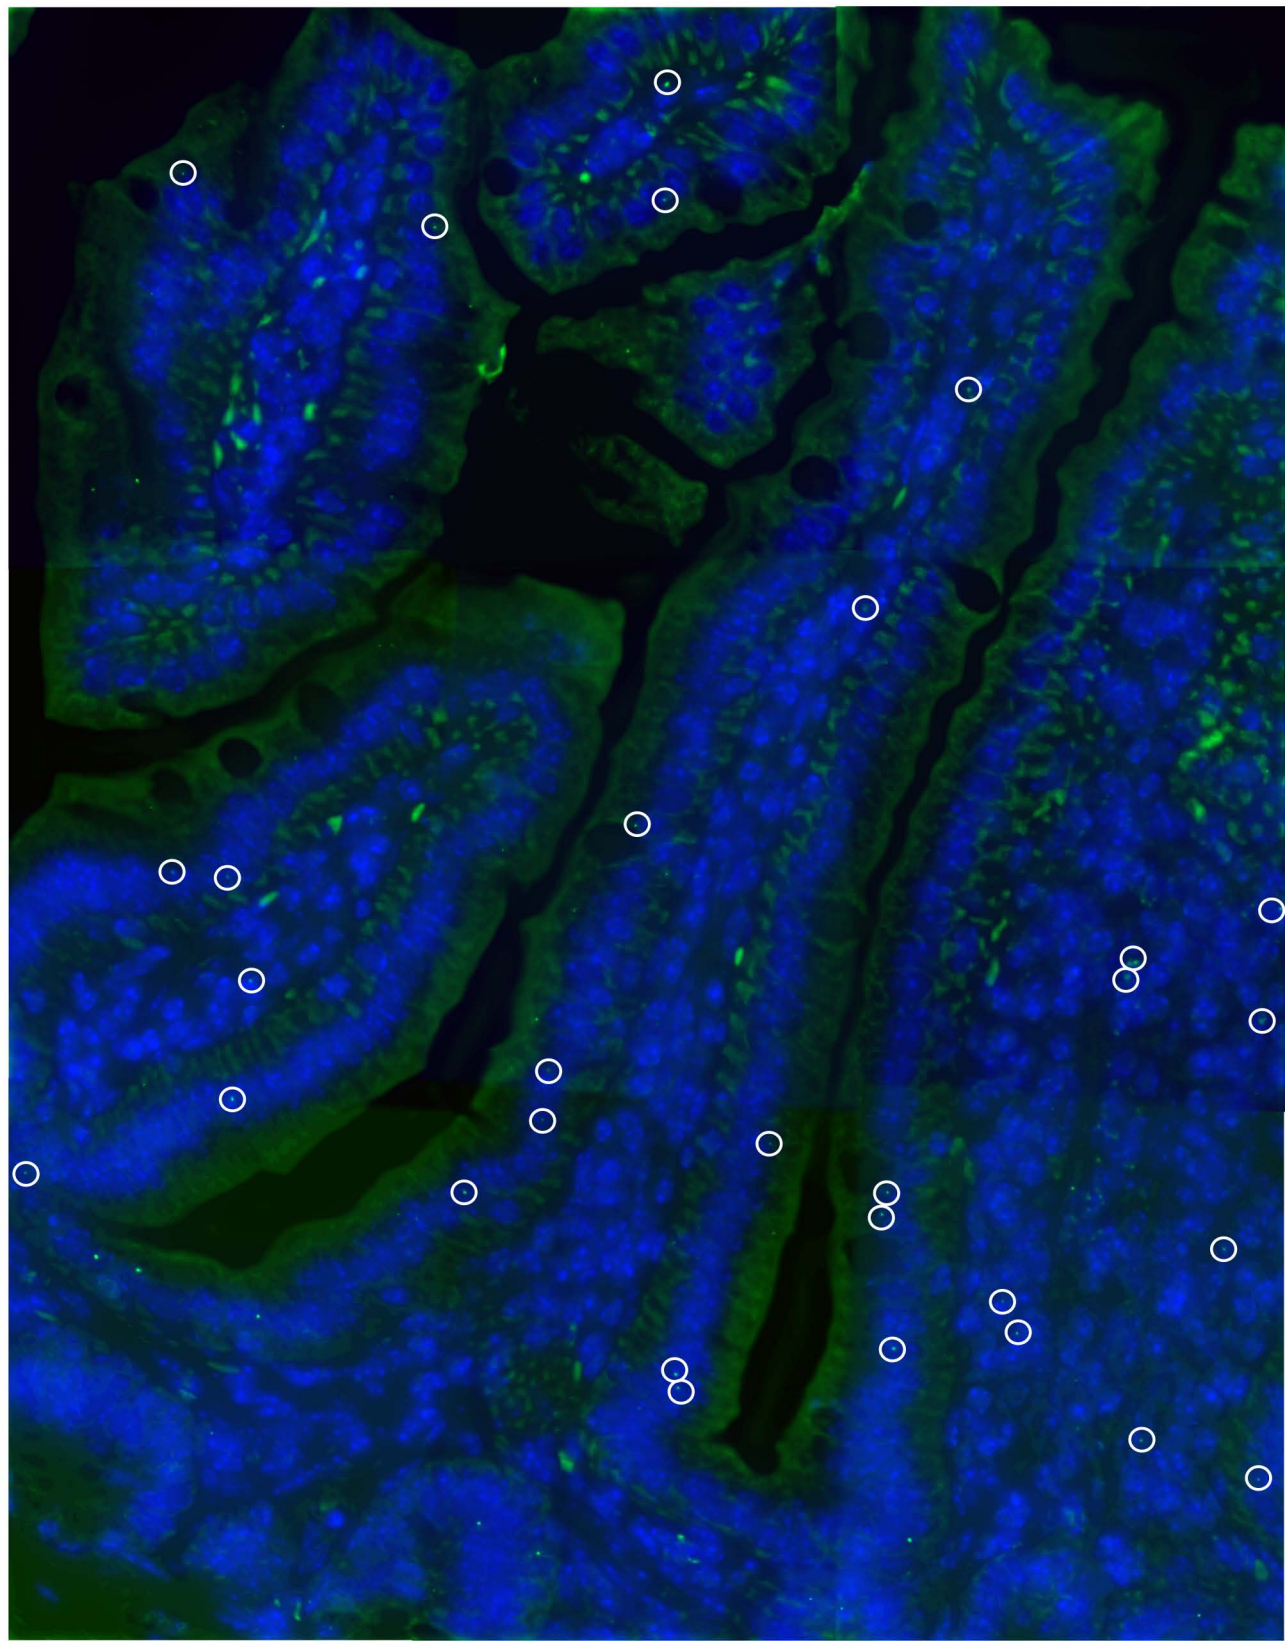

heart control

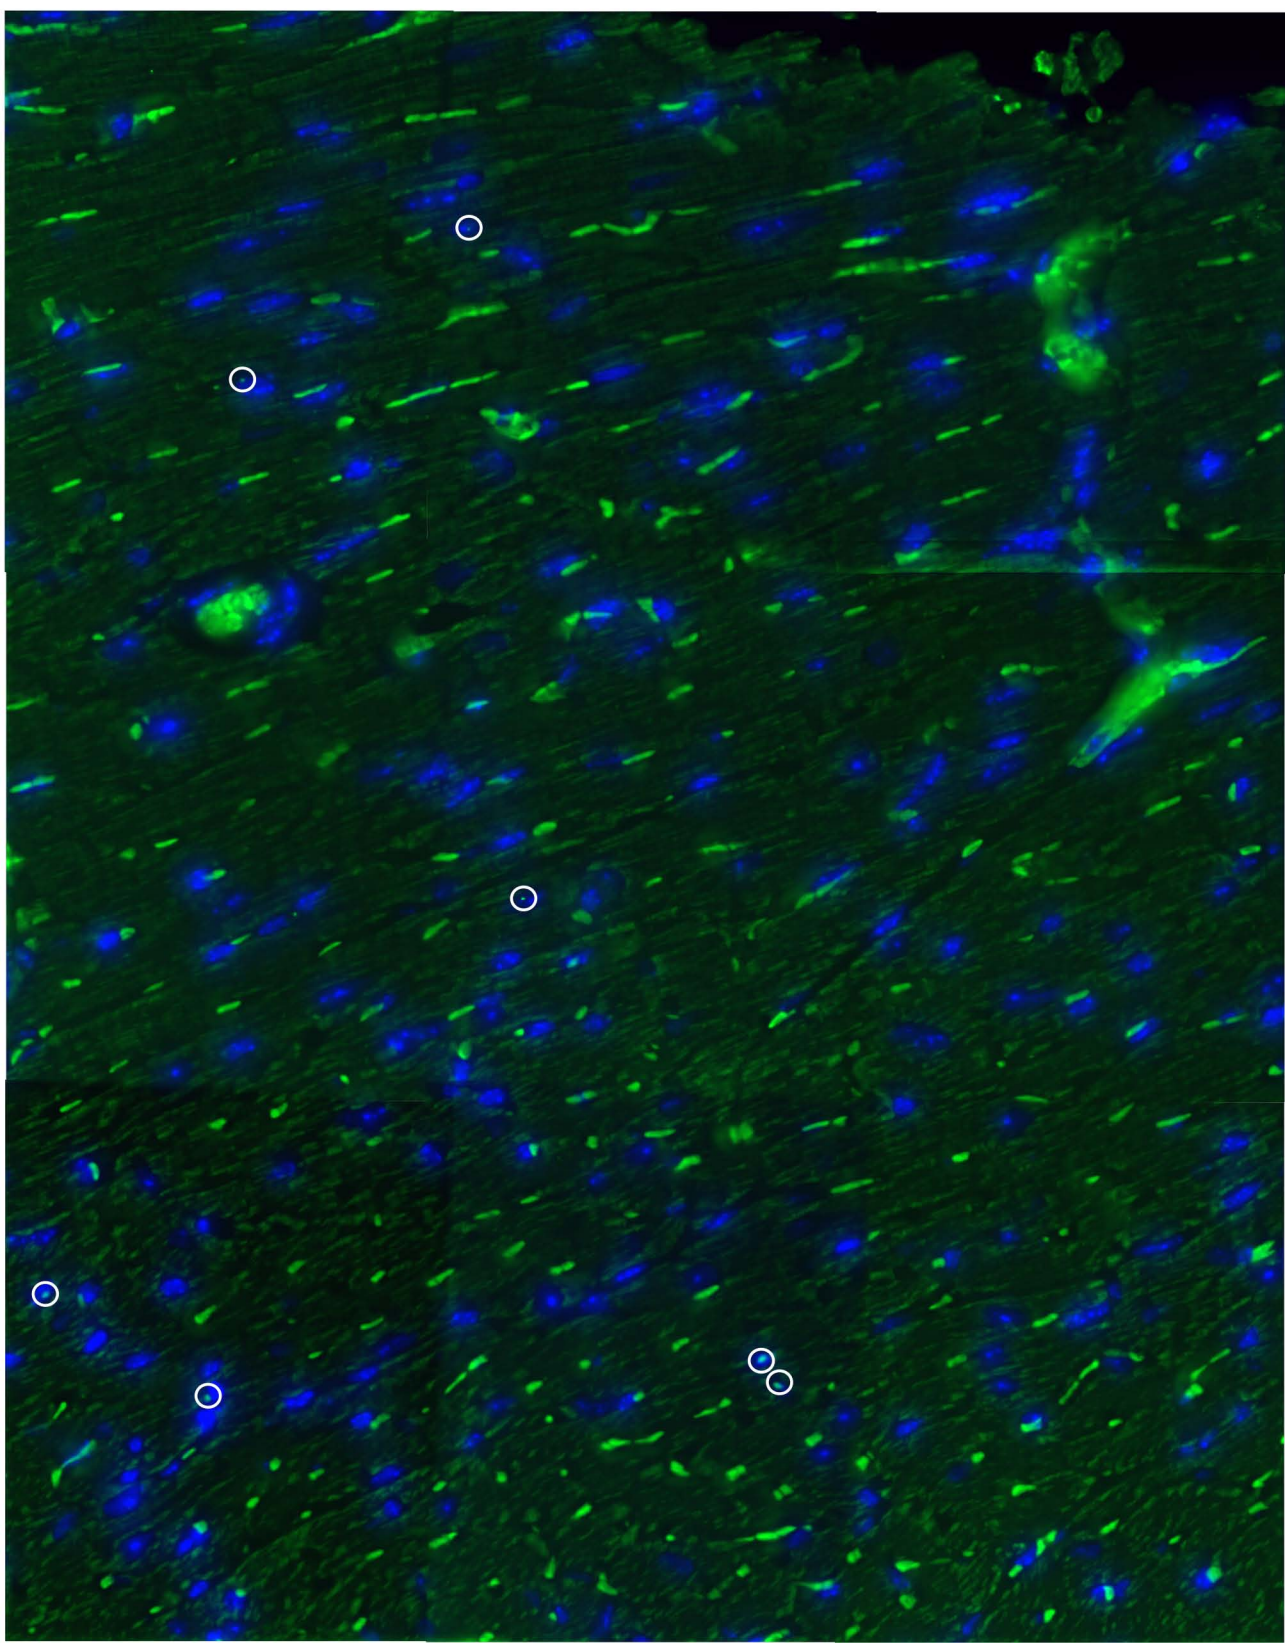

heart 10 mGy 10 min

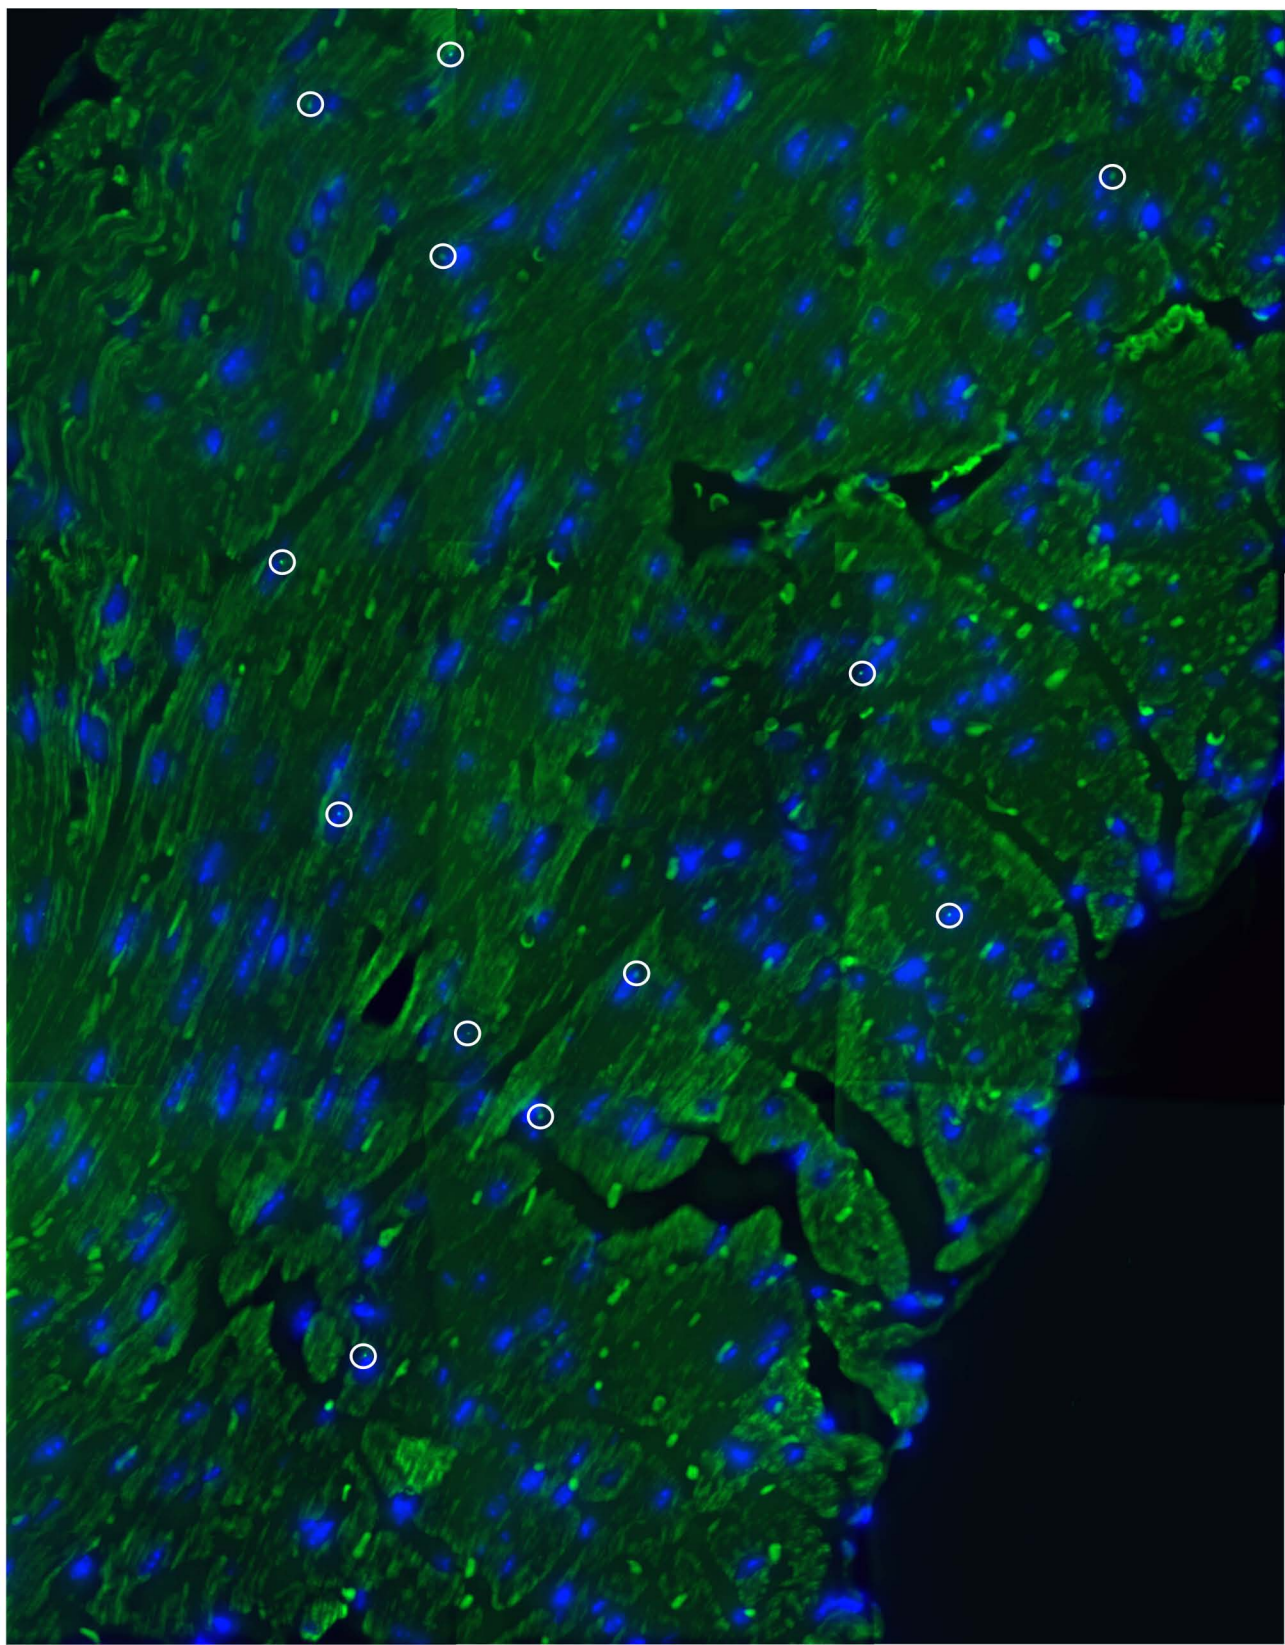

heart 10 mGy 72 h

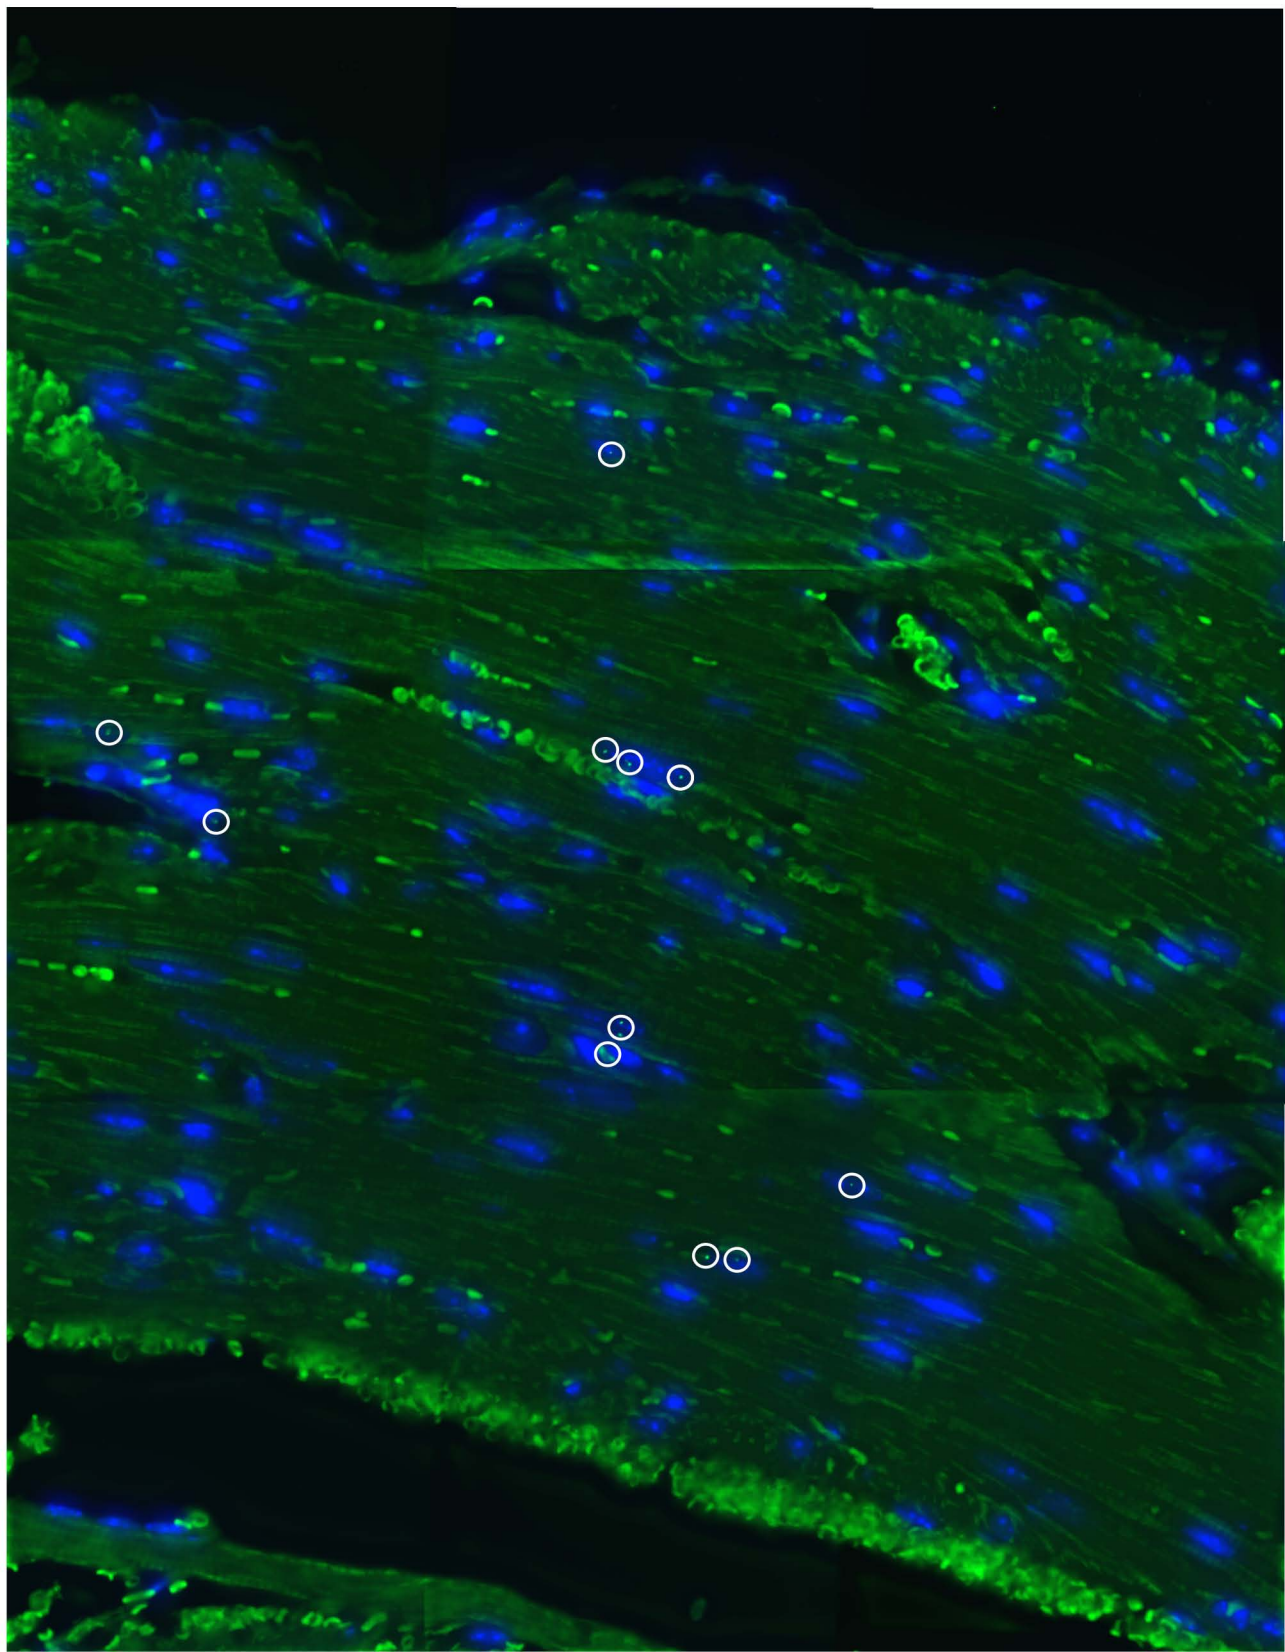

kidney control

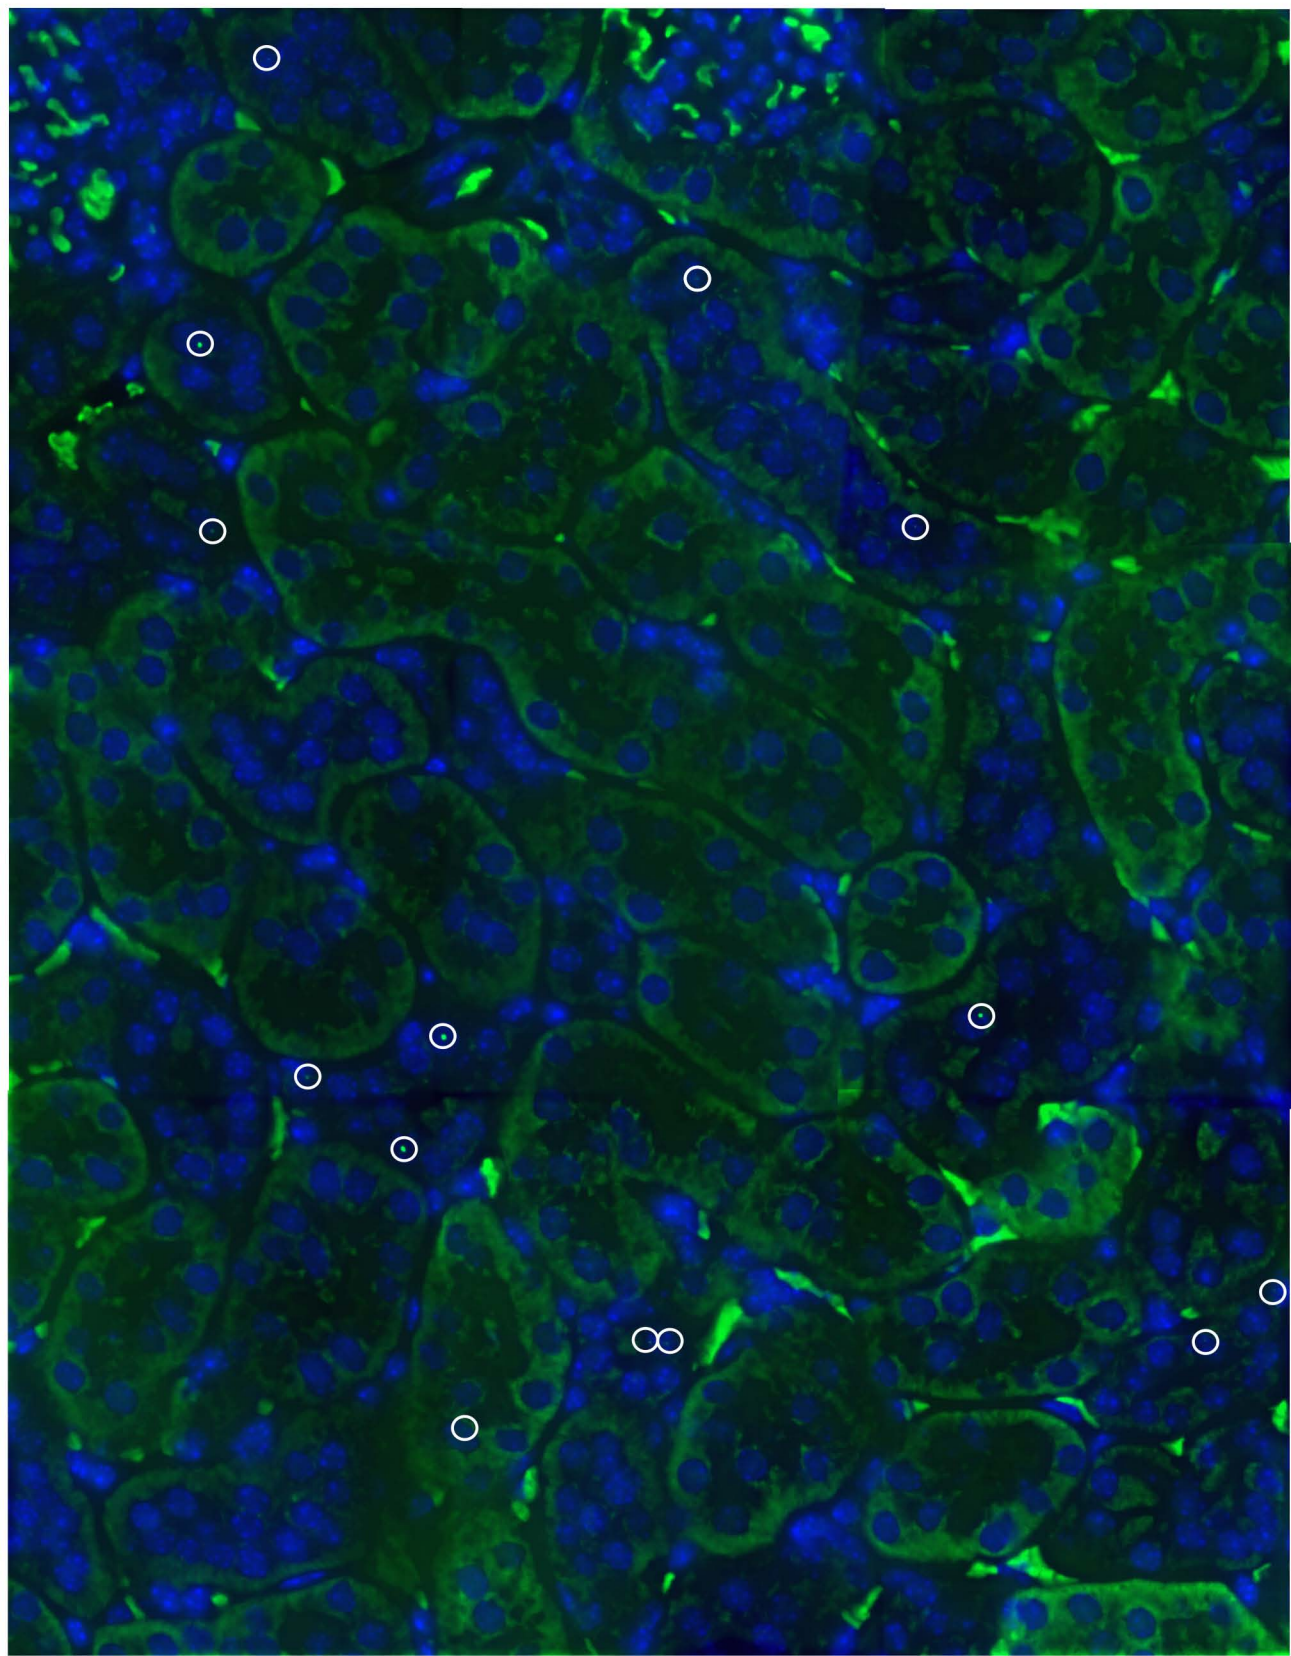

kidney 10 mGy 10 min

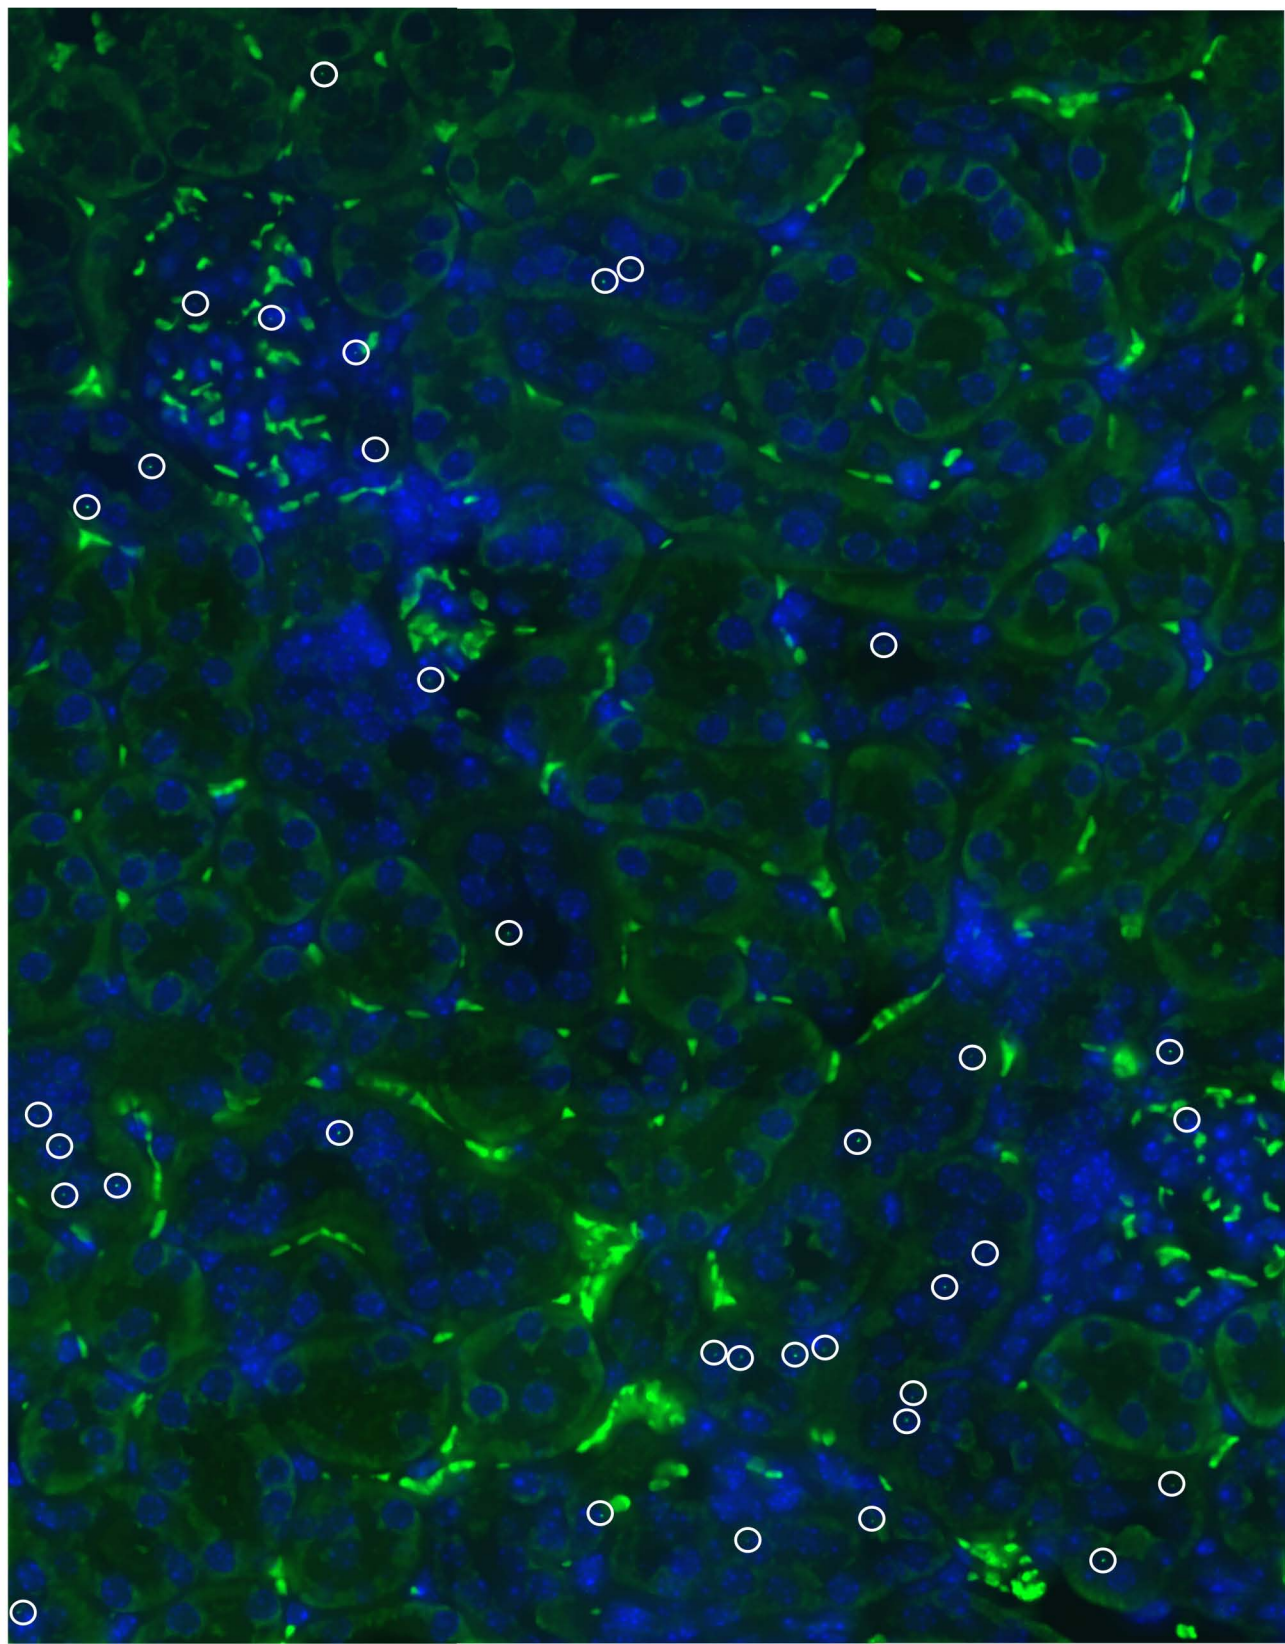



kidney 10 mGy 72 h

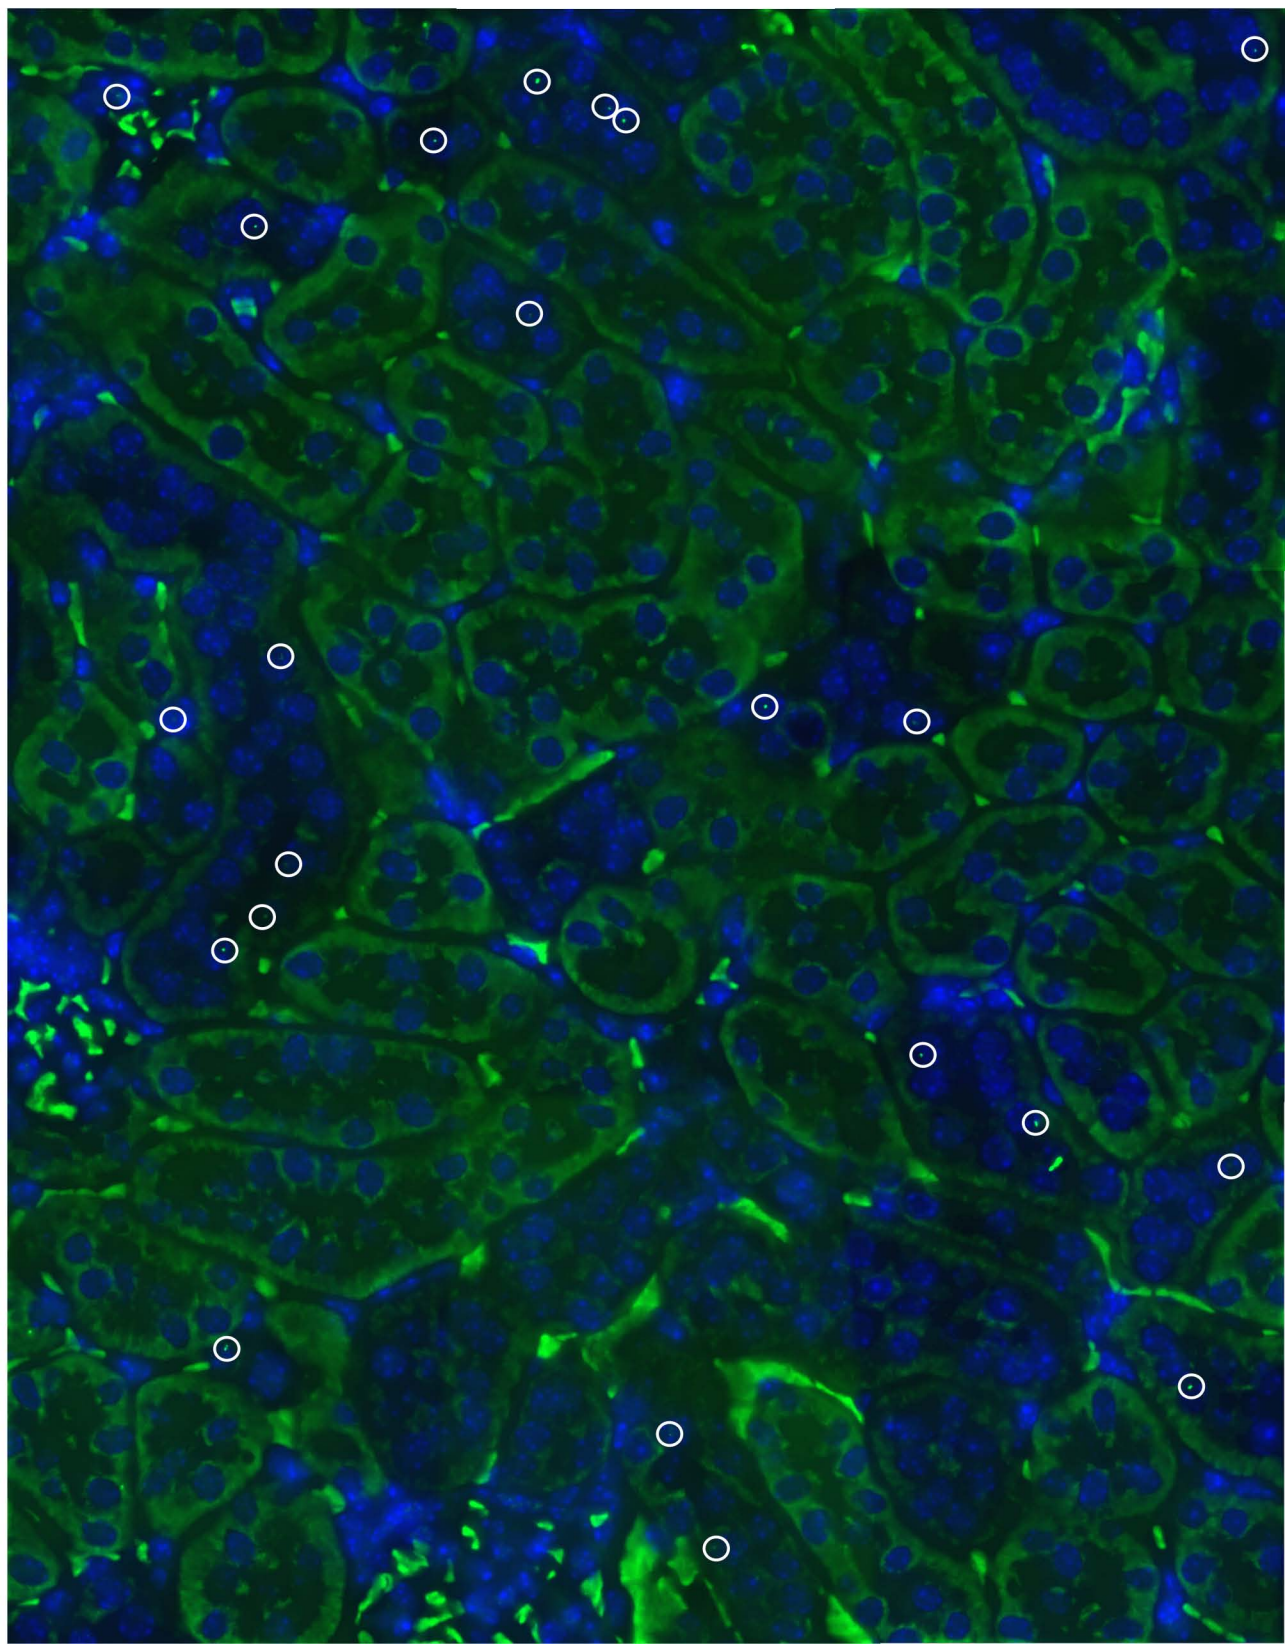

Supplement: 1002213107_sfig05.pdf [file 1002213107_sfig05.pdf]
