# Supplementary material
Source: PubMed Central journal article supplement (PMC2922519)

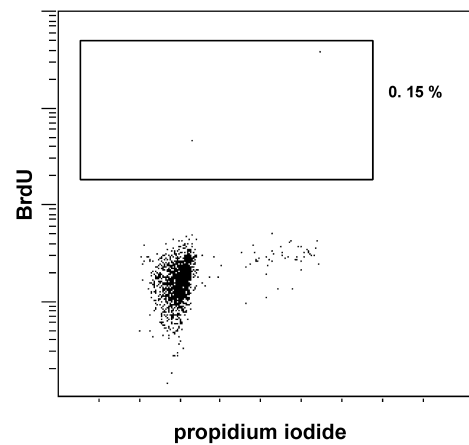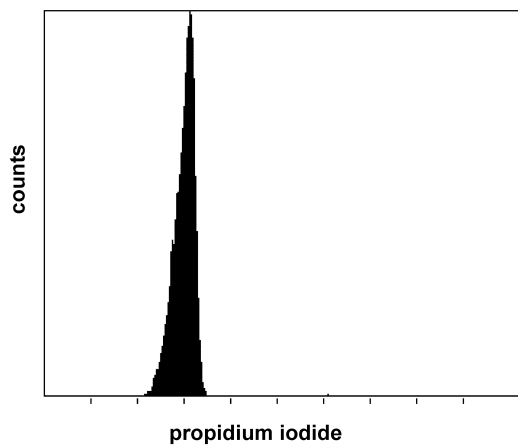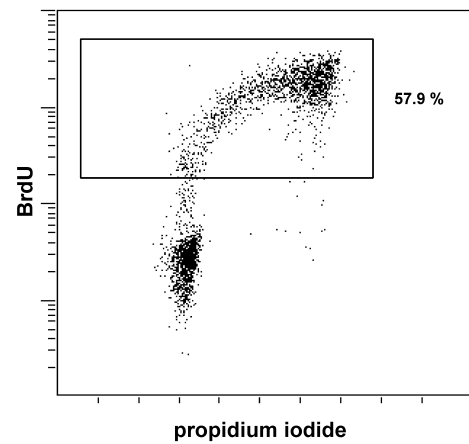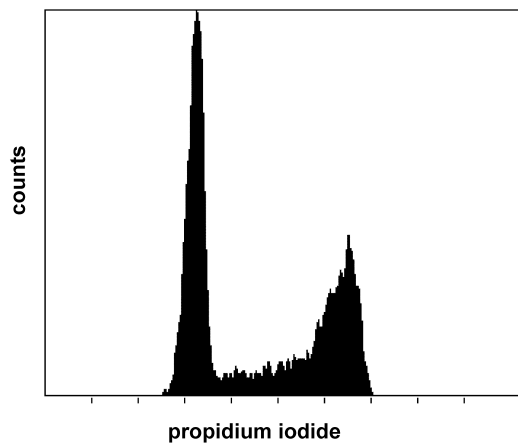

Supplement: 1002213107_sfig01.pdf [file 1002213107_sfig01.pdf]

control

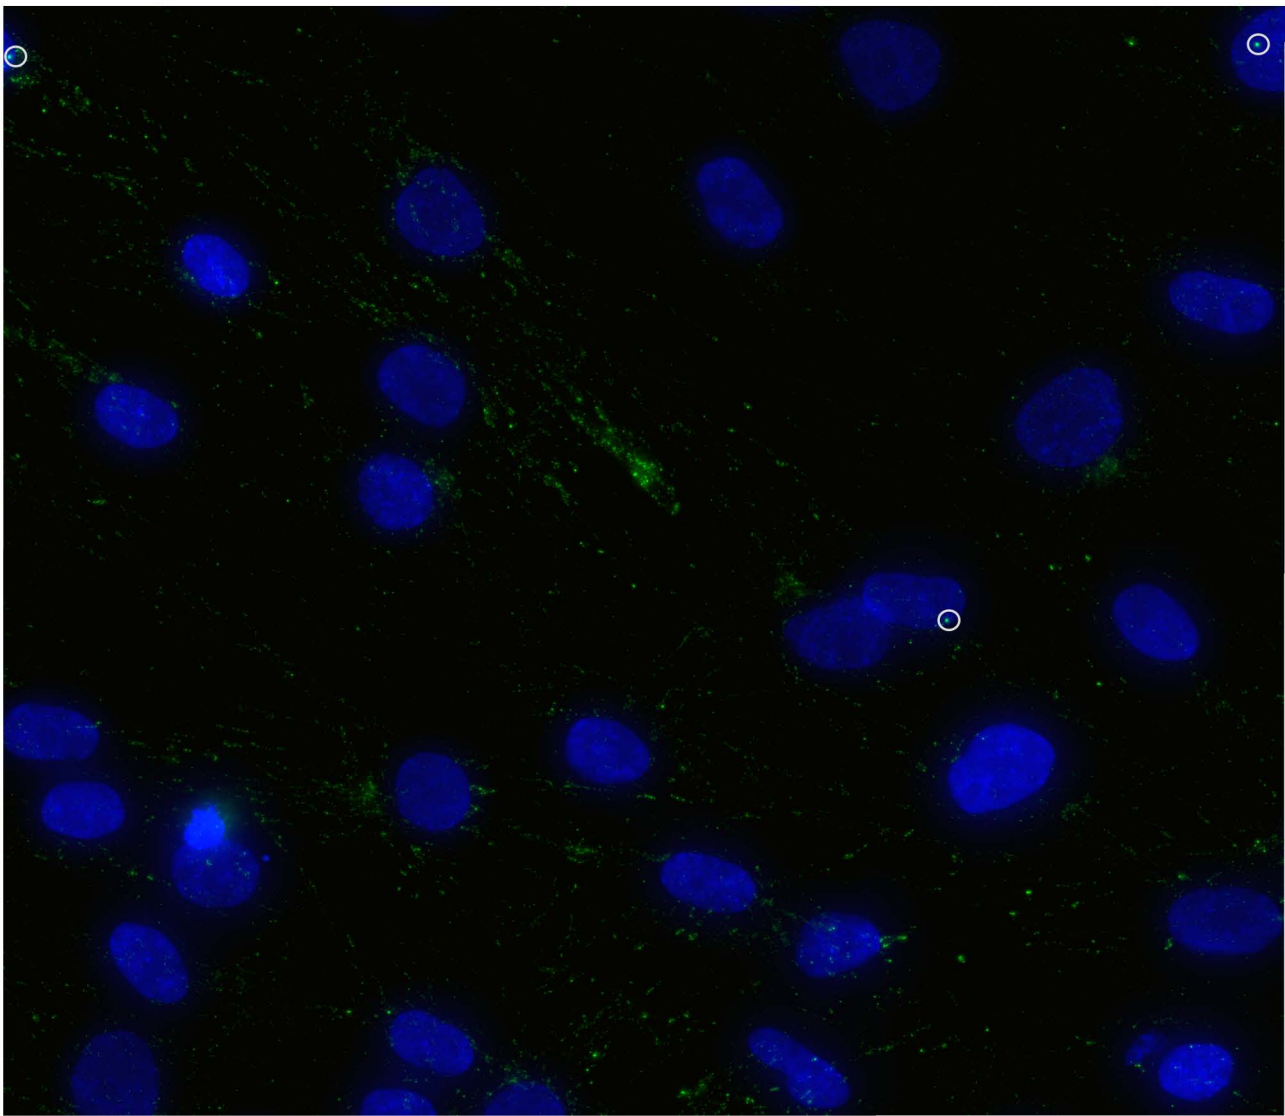

10 mGy 15 min

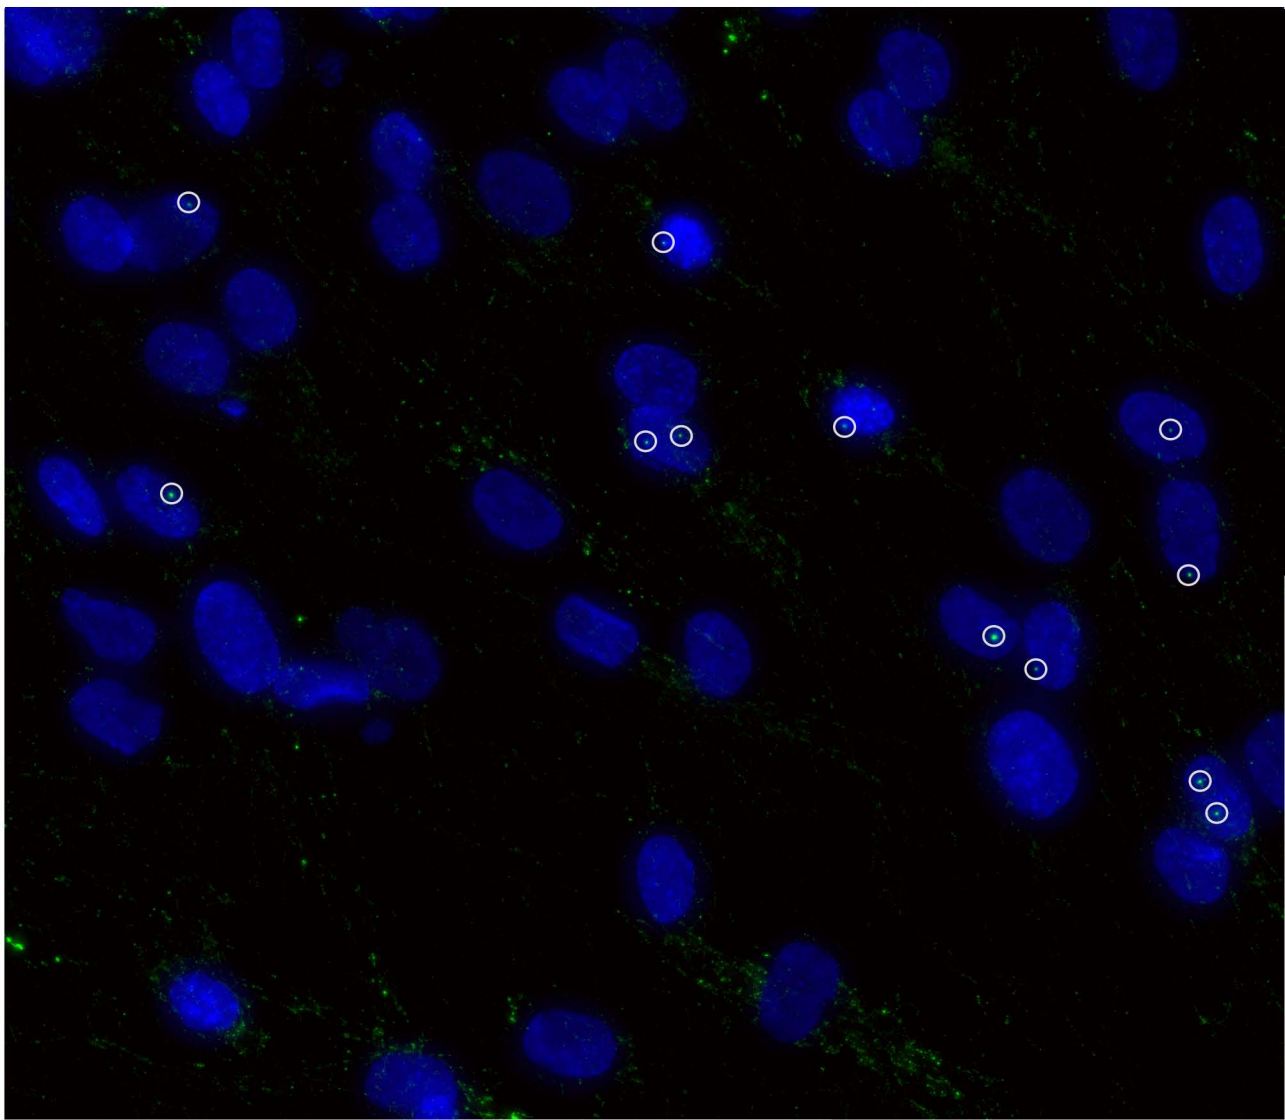

10 mGy 24 h

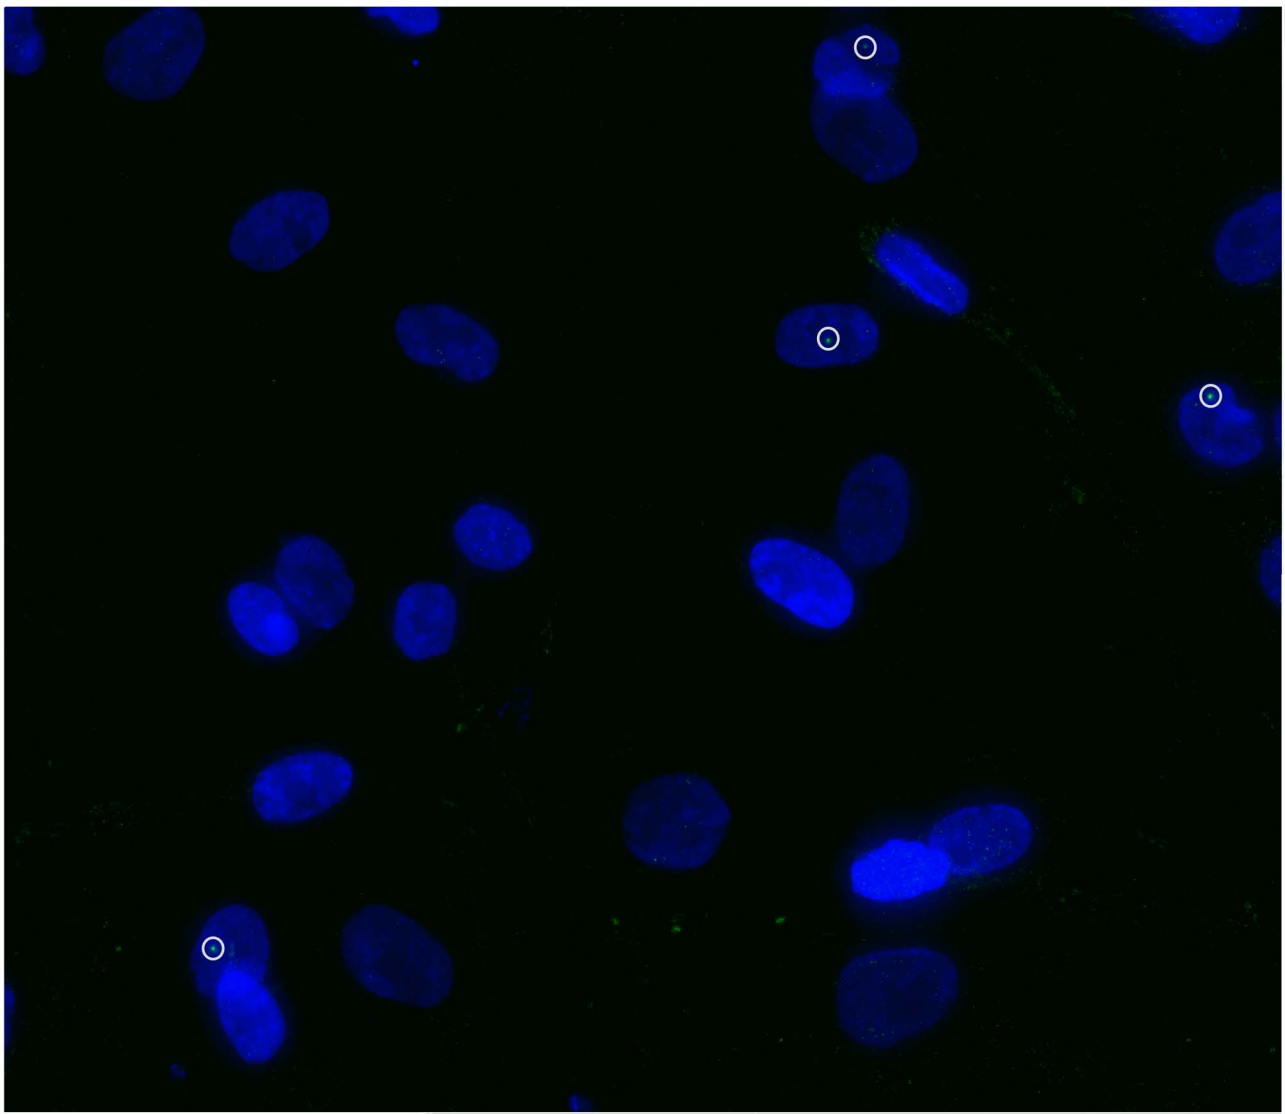

200 mGy 15 min

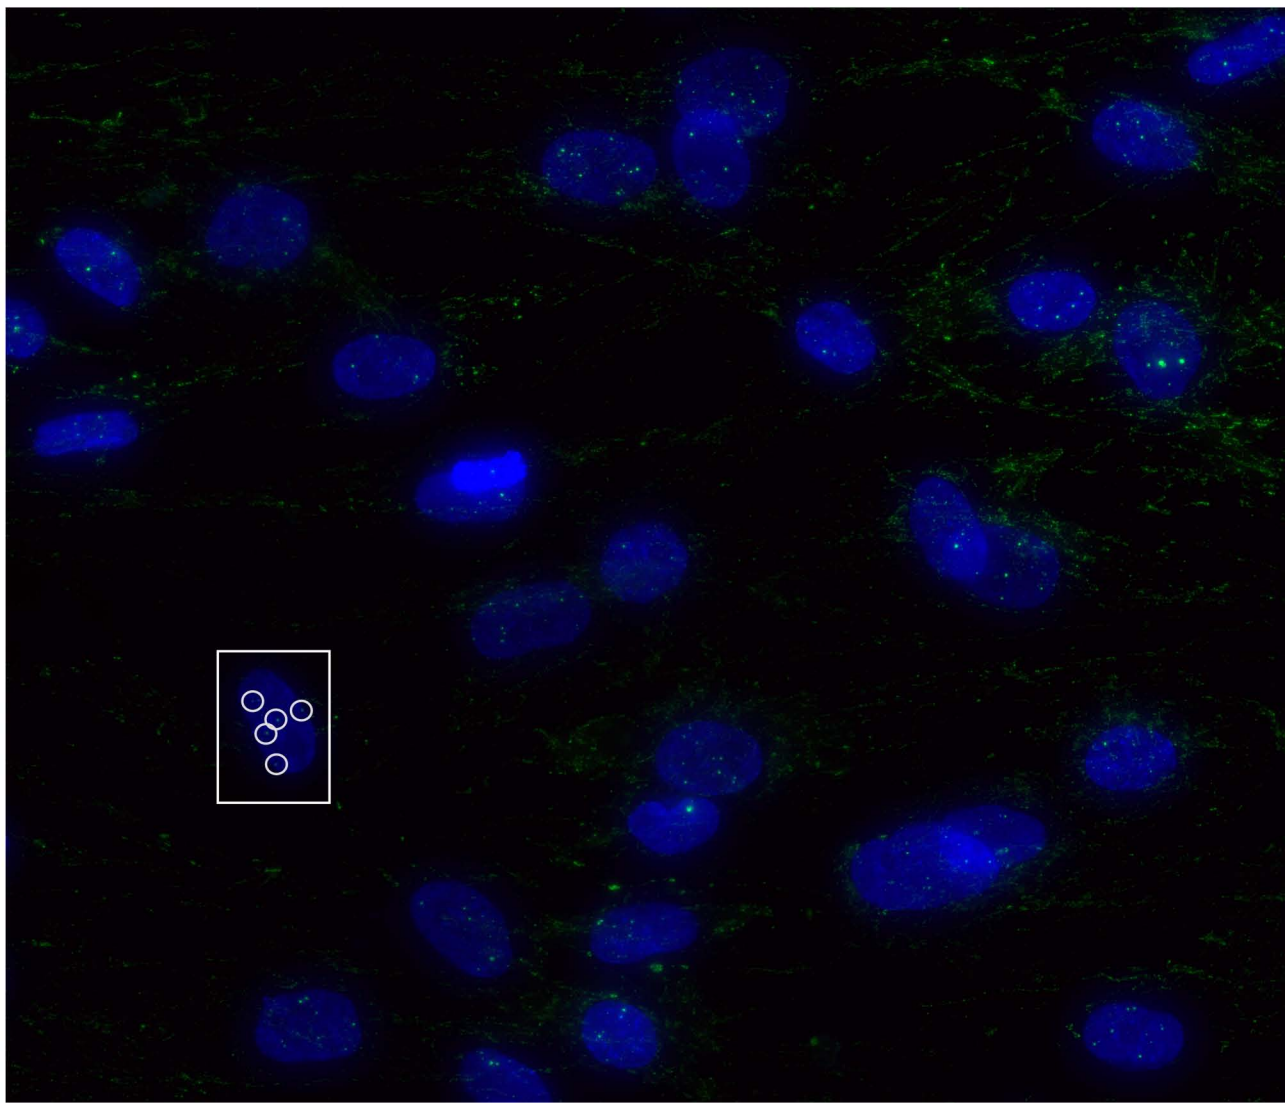

200 mGy 24 h

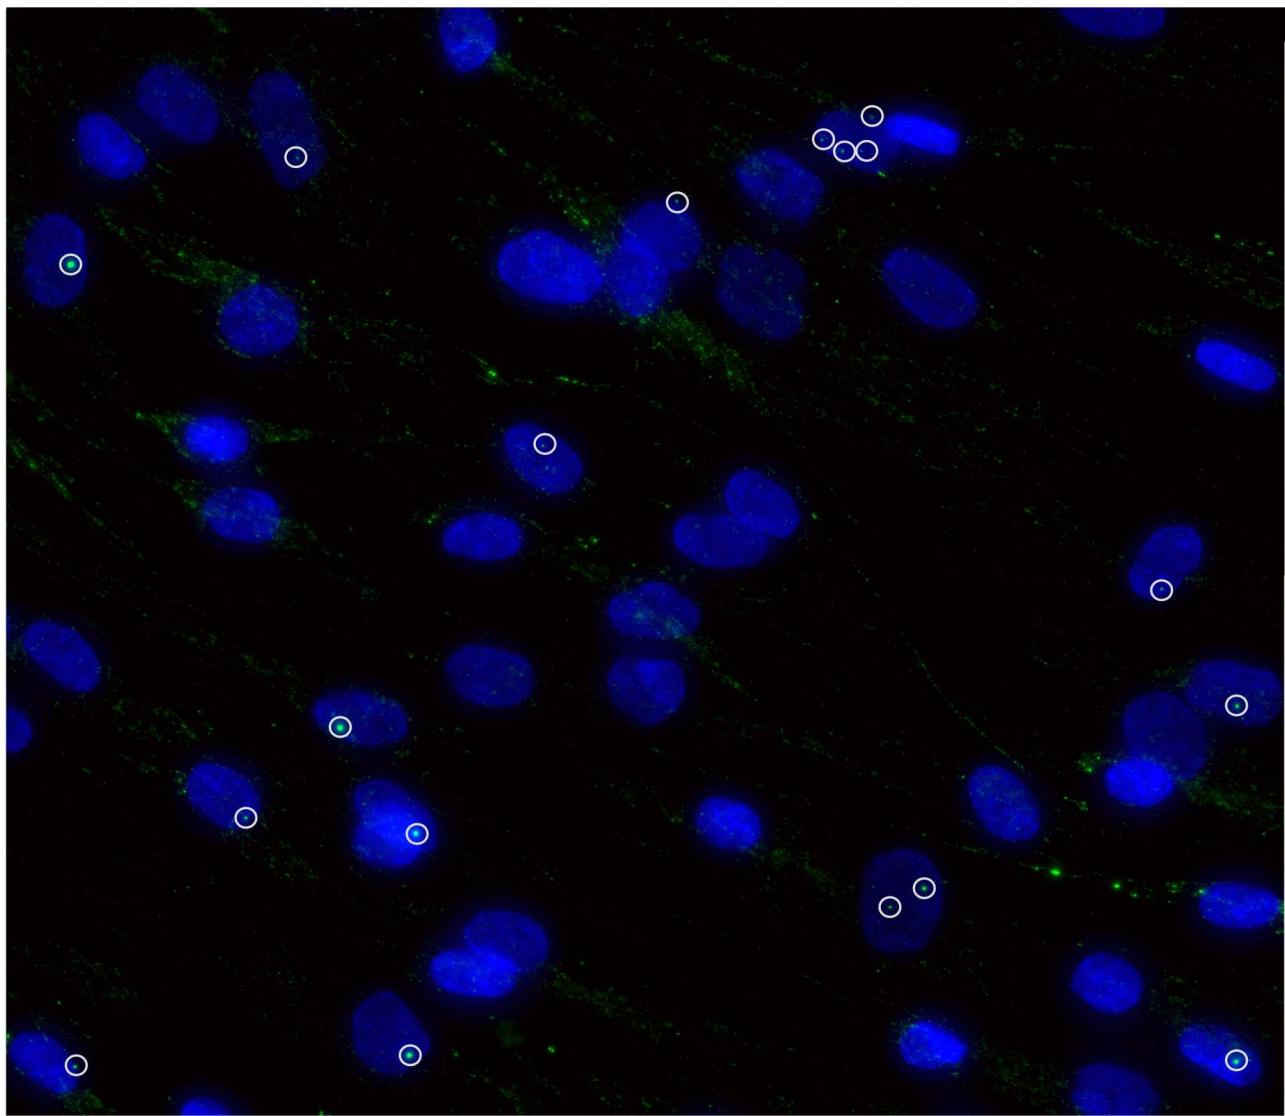

Supplement: 1002213107_sfig02.pdf [file 1002213107_sfig02.pdf]

control

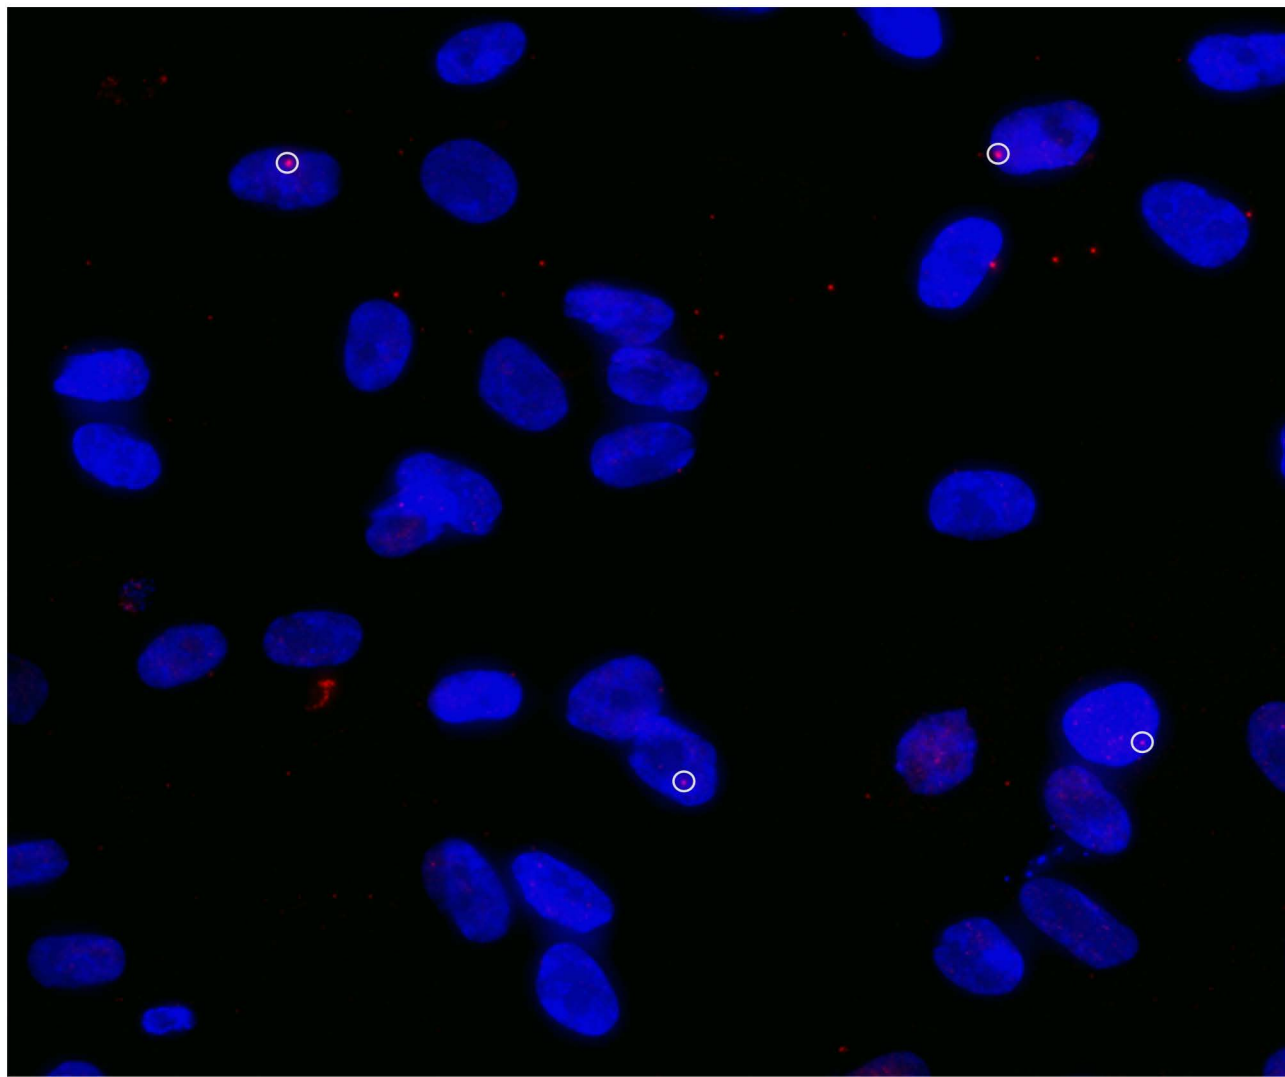

10 mGy 15 min

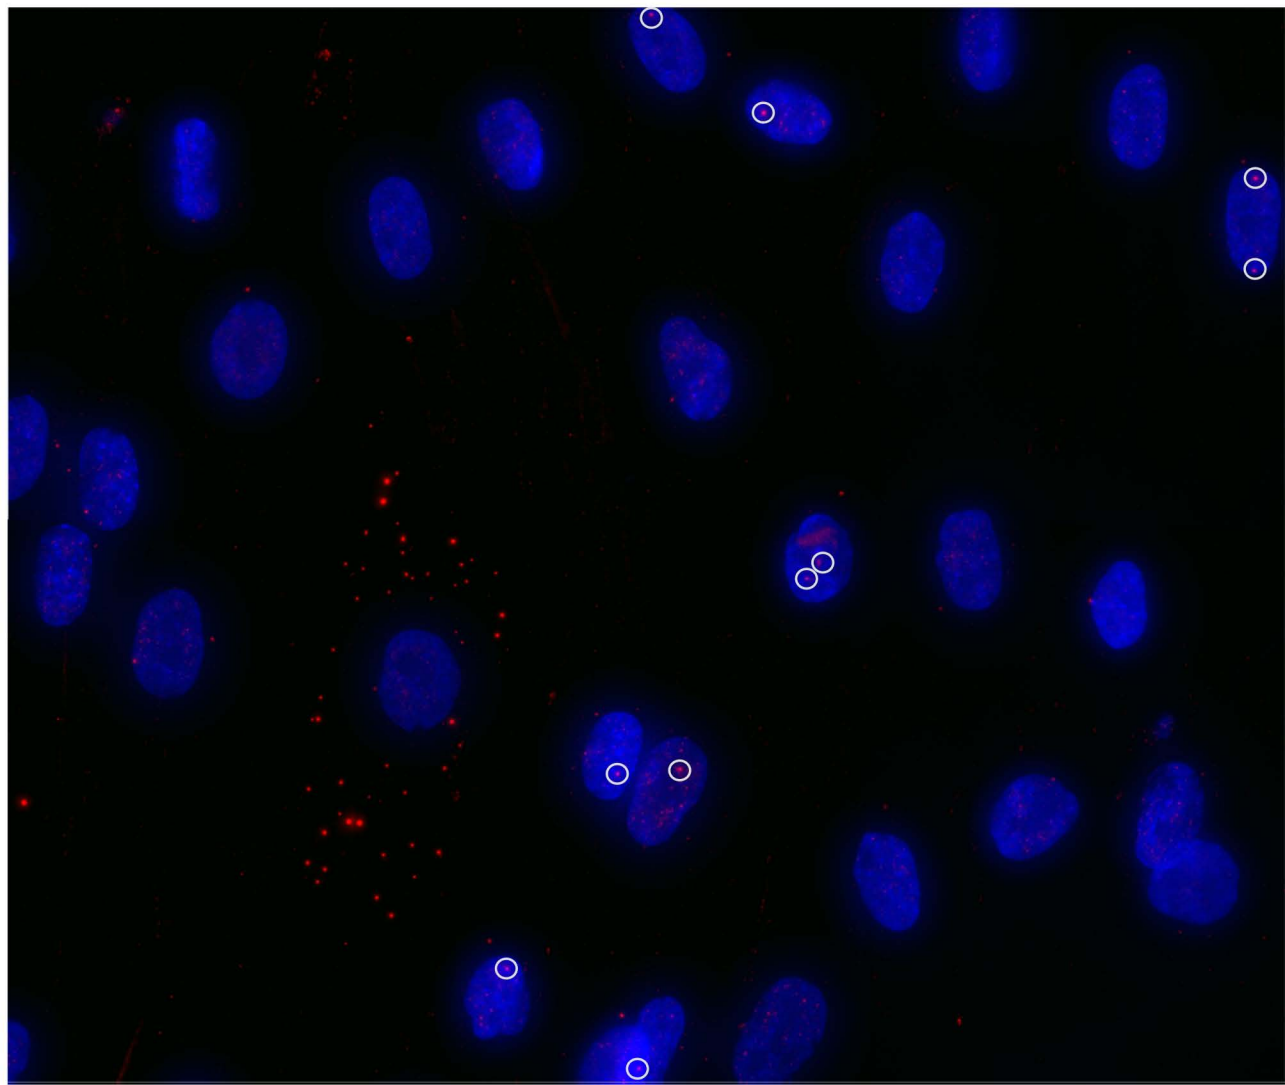

10 mGy 24 h

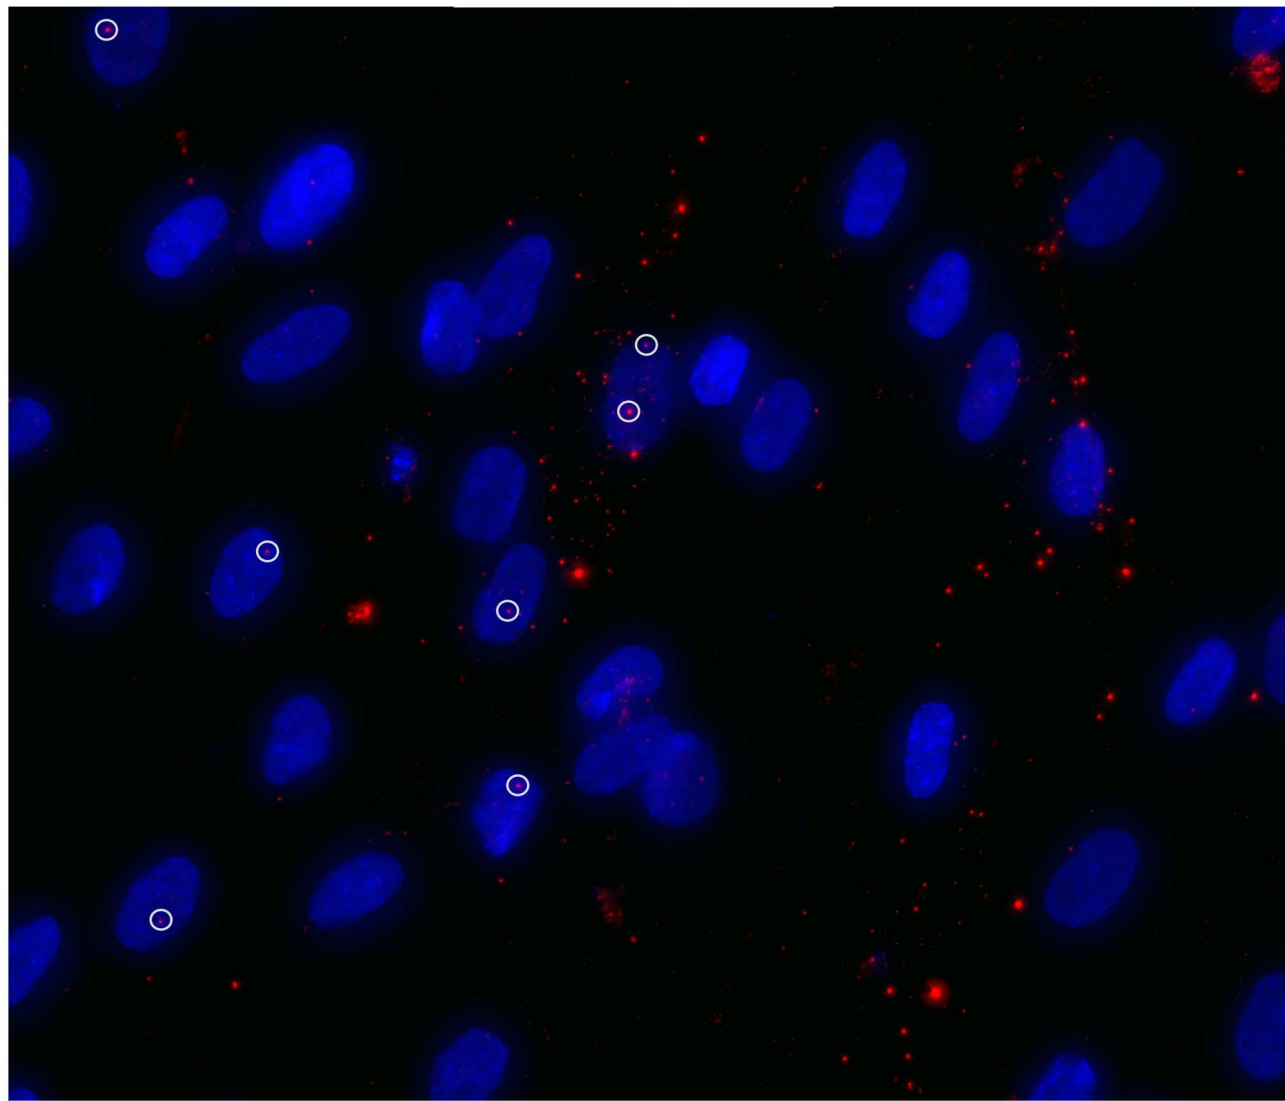

200 mGy 15 min

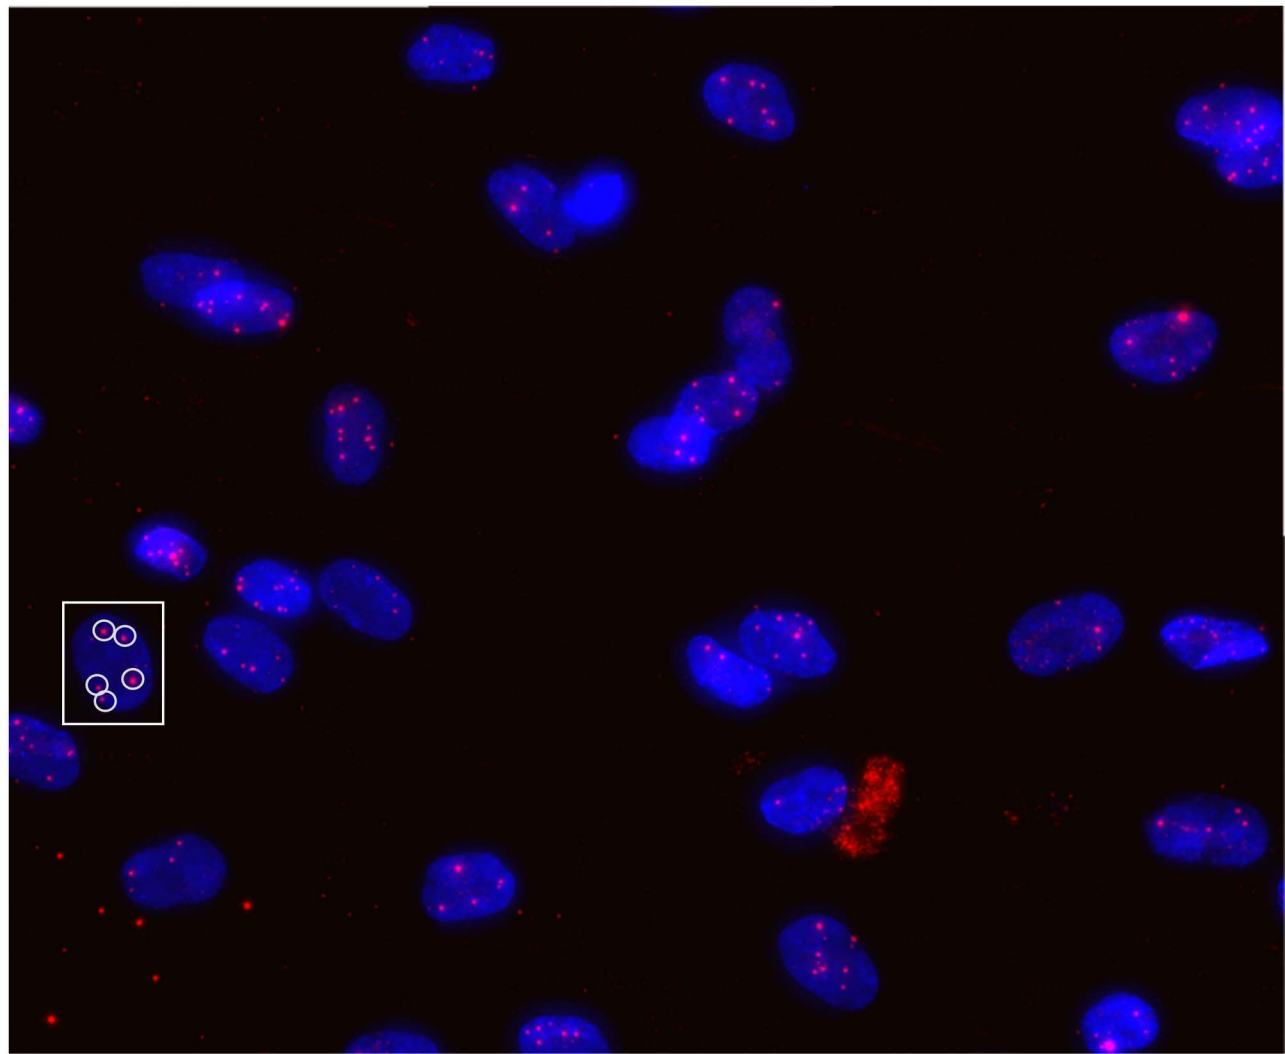

200 mGy 24 h

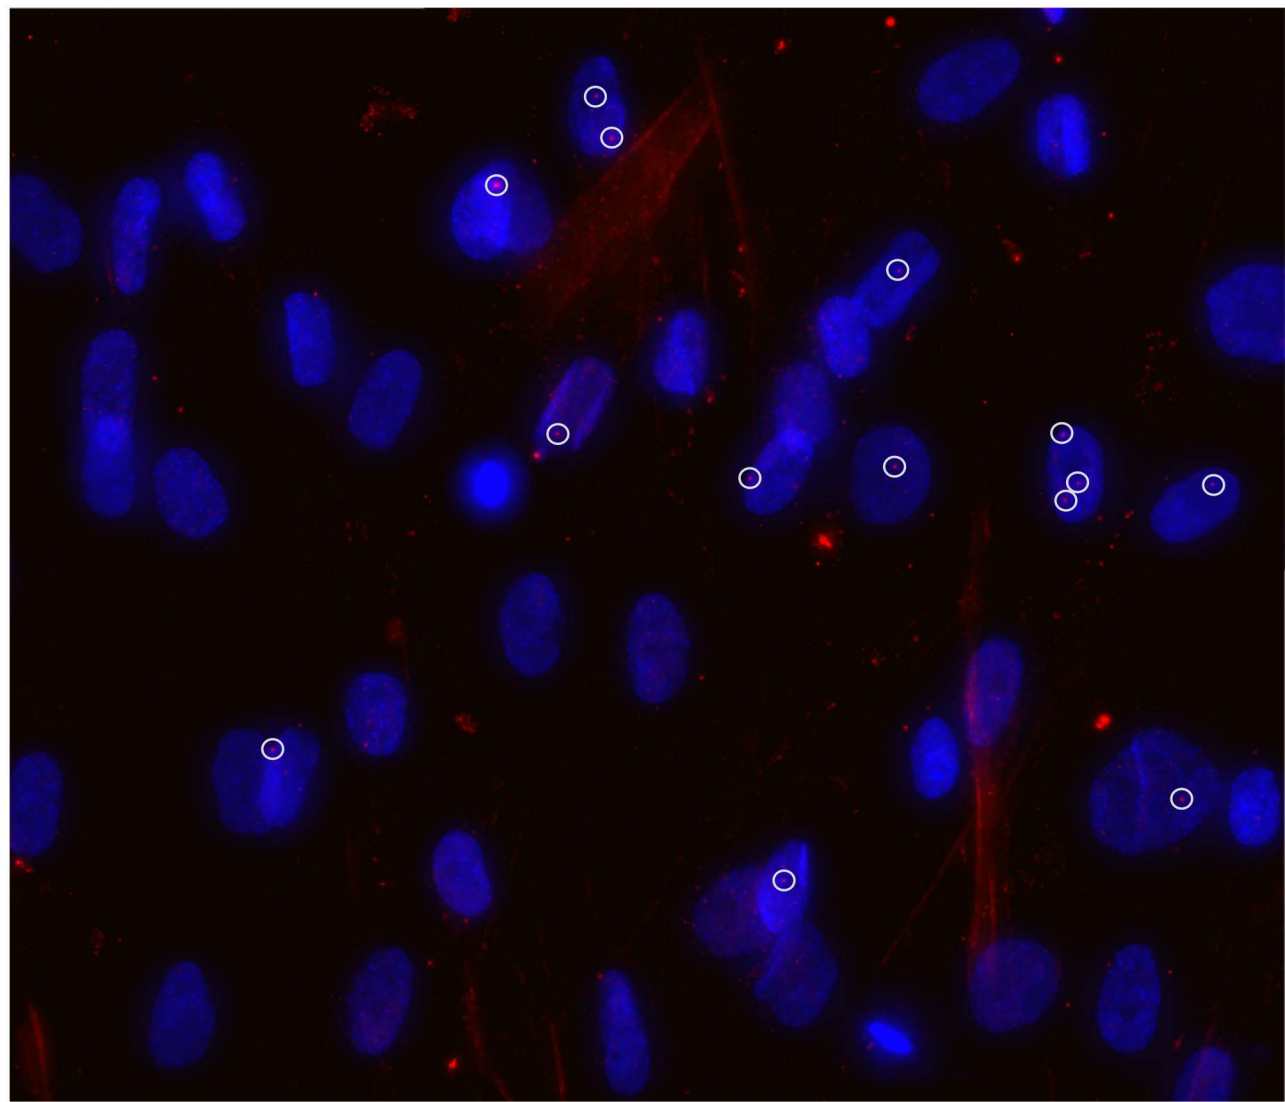

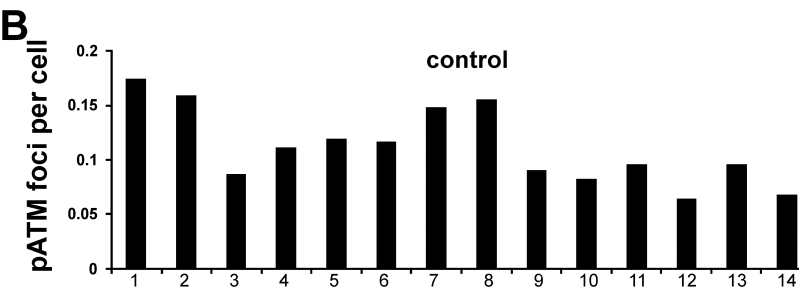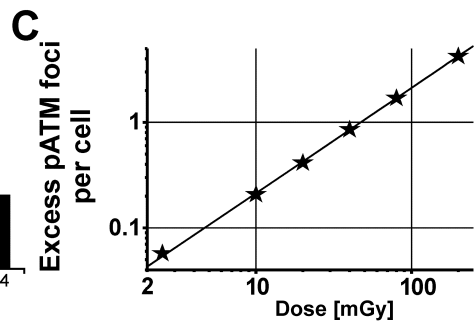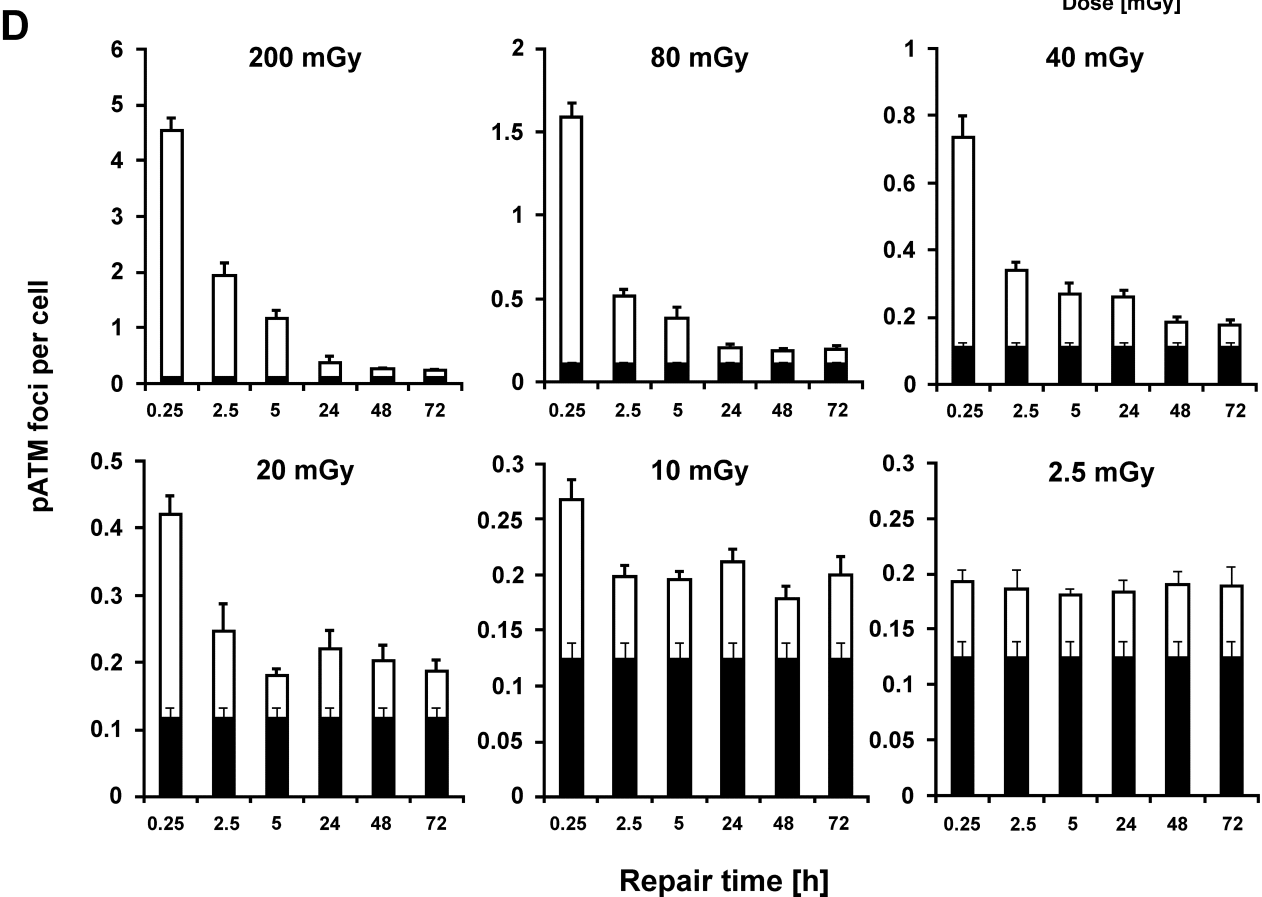

Supplement: 1002213107_sfig03.pdf [file 1002213107_sfig03.pdf]

Excess  $\gamma$ H2AX foci per cell

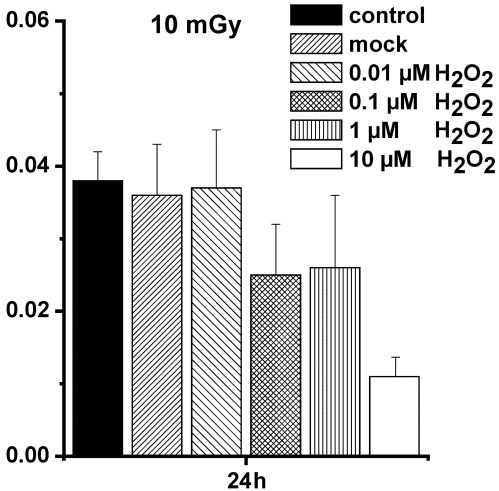

Supplement: 1002213107_sfig04.pdf [file 1002213107_sfig04.pdf]

heart

small intestine

kidney

control

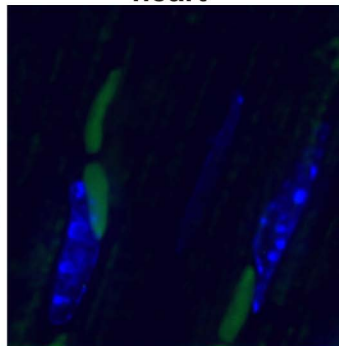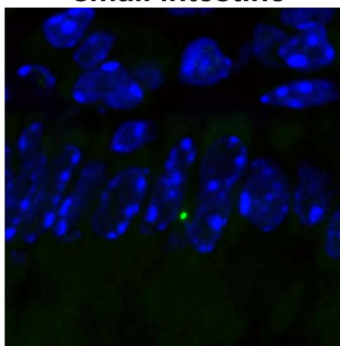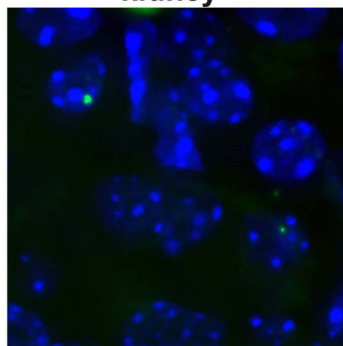

1 Gy  
10 min

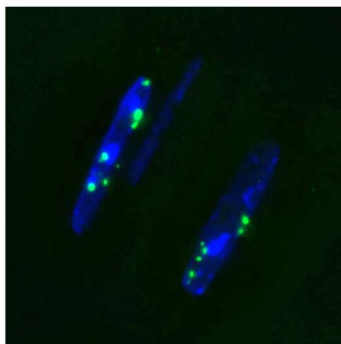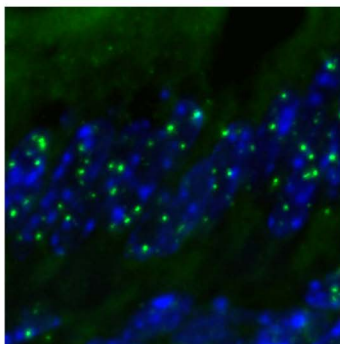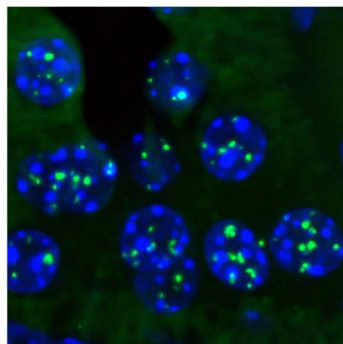

1 Gy  
5h

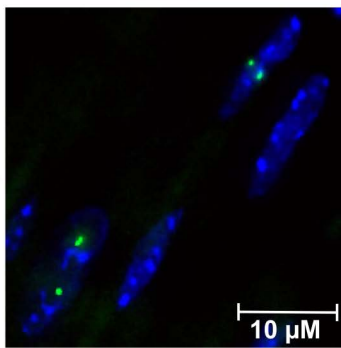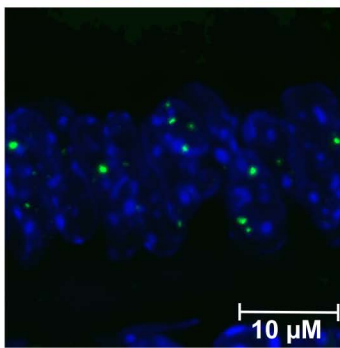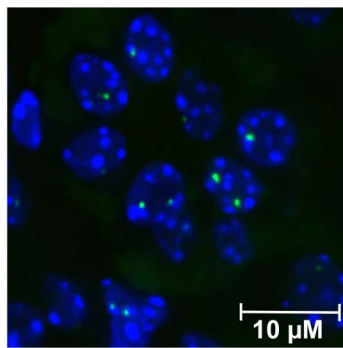

Supplement: 1002213107_sfig06.pdf [file 1002213107_sfig06.pdf]

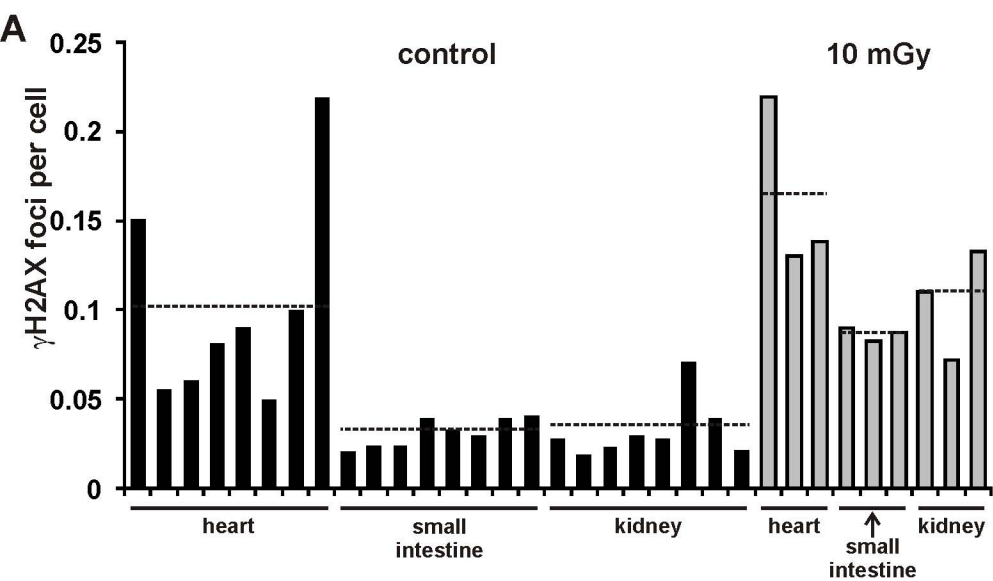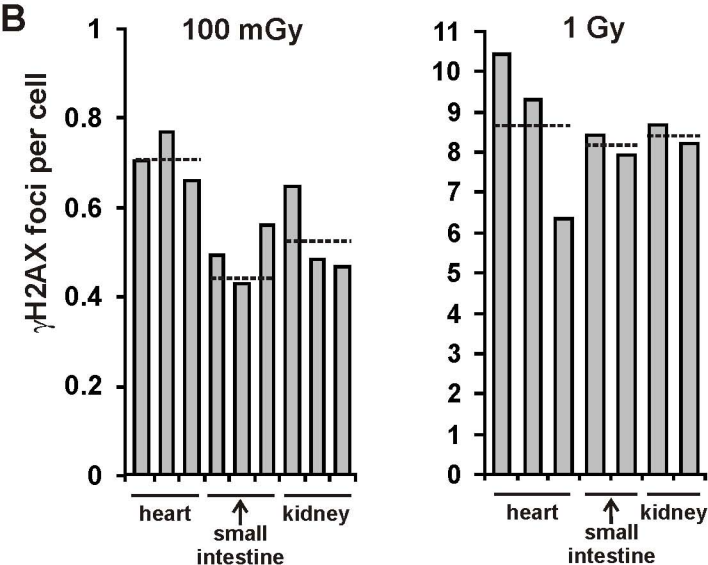

Supplement: 1002213107_sfig07.pdf [file 1002213107_sfig07.pdf]

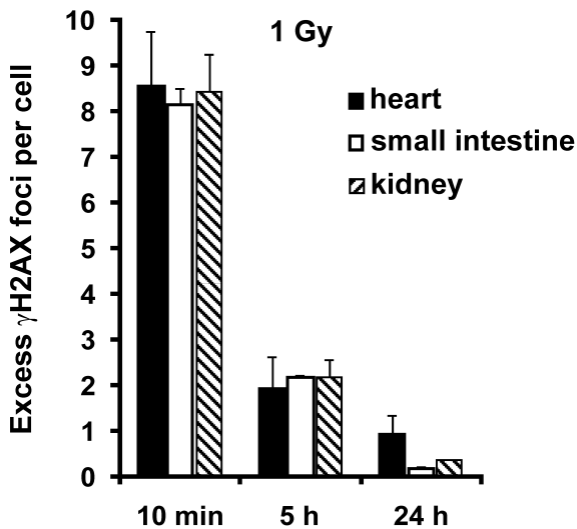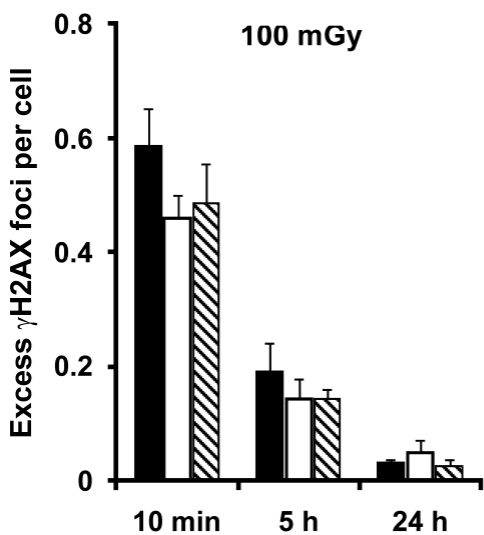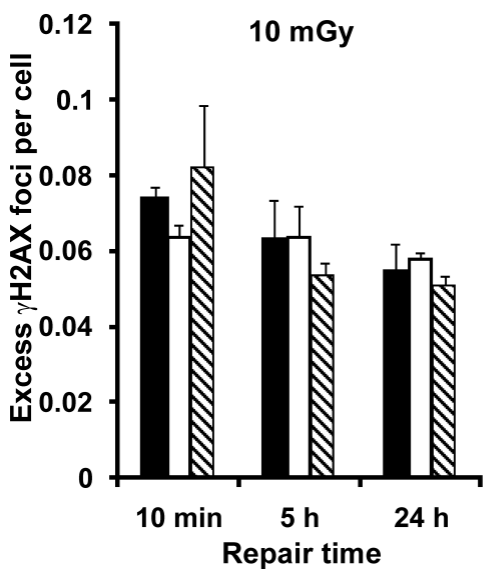

Supplement: 1002213107_sfig08.pdf [file 1002213107_sfig08.pdf]
